# Supplementary material for: Influence of odd–even effect and intermolecular interactions in 2D molecular layers of bisamide organogelators
Source: PubMed Central journal article supplement — RSC Adv. 2018 Oct 15;8(61):35195–204. doi: 10.1039/c8ra06224b (PMC9088050; doi:10.1039/c8ra06224b), 2018-10-15
Supplement: RA-008-C8RA06224B-s001.pdf [file RA-008-C8RA06224B-s001.pdf]

## Supporting Information

### Influence of Odd-Even Effect and Intermolecular Interactions in 2D

#### Molecular Layers of Bisamide Organogelators

*Volga Kocasoy<sup>1</sup>, Burcu Dedeoğlu<sup>\*2</sup>, Öznur Demir-Ordu<sup>3</sup>, Viktorya Aviyente<sup>\*1</sup>*

<sup>1</sup> Department of Chemistry, Bogazici University, 34342, Bebek, Istanbul, Turkey

<sup>2</sup> Department of Chemistry, Gebze Technical University, 41400, Gebze, Kocaeli, Turkey

<sup>3</sup> Department of Chemistry, Abant Izzet Baysal University, 14030, Golkoy, Bolu, Turkey

\*corresponding author(s):

b.dedeoglu@gtu.edu.tr

aviye@boun.edu.tr

**KEYWORDS.** Organogelators, self-assembly, DFT, odd-even effect, H-bonding

# Table of Contents

## I. Structures of Trimers (B3LYP-D3/6-311+G\*\*)

**Figure S1.** Structures of 2-anti-t-D, 2-para-t-D, 3-anti-t-D, 3-para-t-D, 4-anti-t-D, 4-para-t-D, 5-anti-t-D and 5-para-t-D. (B3LYP/6-311+G\*\* (Solvent=Benzene)).....S3

## II. Energetics of Trimers

**Table S1.** Gibbs Free Energies ( $G_{\text{rel}}$ , kcal/mol) of trimers optimized at B3LYP/6-311+G\*\* // B3LYP-D3/6-311+G\*\* relative to B3LYP/6-311+G\*\* level of theory (Solvent=(Benzene)).....S4

**Table S2.** Relative Gibbs Free Energies ( $G_{\text{rel}}$ , kcal/mol) between antiparallel (anti) and parallel (para) arrangements of optimized trimer structures and the total stabilization energies (kcal/mol). ((B3LYP-D3/6-311+G\*\*//B3LYP/6-311+G\*\* (Solvent=Benzene)).....S4

**III. Coordinates and Gibbs Free Energies (a.u) of Dimer and Trimers (B3LYP/6-311+G\*\* (Solvent=Benzene)).....S5-S24**

## I. Structures of Trimers (B3LYP-D3/6-311+G\*\*)

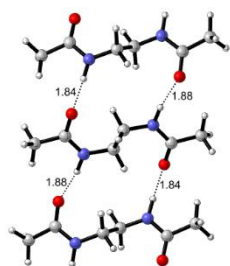

(-1487.67679)

2-anti-t-D

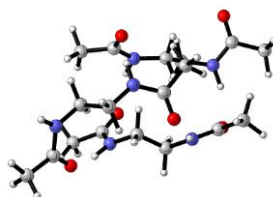

(-1487.672586)

2-para-t-D

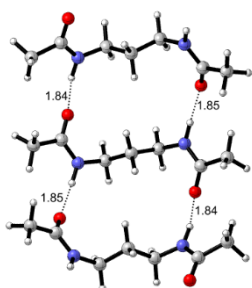

(-1605.576458)

3-anti-t-D

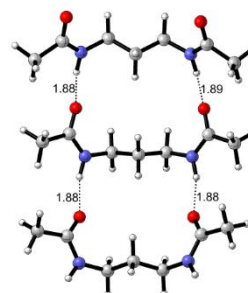

(-1605.571620)

3-para-t-D

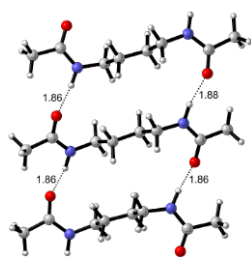

(-1723.484014)

4-anti-t-D

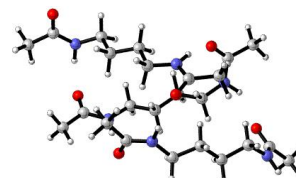

(-1723.484601)

4-para-t-D

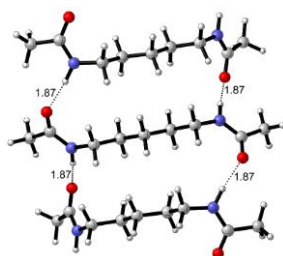

(-1841.385854)

5-anti-t-D

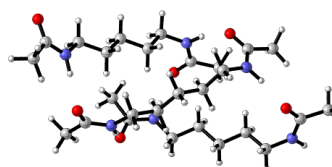

(-1841.391285)

5-para-t-D

**Figure S1.** Structures of 2-anti-t-D, 2-para-t-D, 3-anti-t-D, 3-para-t-D, 4-anti-t-D, 4-para-t-D, 5-anti-t-D and 5-para-t-D. (B3LYP/6-311+G\*\* (Solvent=Benzene)). (Gibbs free energies (a.u) are given in parentheses).

## II. Energetics of Trimers

**Table S1.** Gibbs Free Energies ( $G_{\text{rel}}$ , kcal/mol) of trimers calculated at B3LYP/6-311+G\*\* // B3LYP-D3/6-311+G\*\* relative to B3LYP/6-311+G\*\* level of theory (Solvent=(Benzene)).

| B3LYP/6-311+G** |              | B3LYP/6-311+G**//B3LYP-D3/6-311+G** |              |                  |
|-----------------|--------------|-------------------------------------|--------------|------------------|
| n-anti/para     | $G$          | n-anti/para                         | $G$          | $G_{\text{rel}}$ |
| 2-anti-t        | -1487.616597 | 2-anti-t-D                          | -1487.602614 | 8.8              |
| 2-para-t        | -1487.608113 | 2-para-t-D                          | -1487.583163 | 15.7             |
| 3-anti-t        | -1605.508474 | 3-anti-t-D                          | -1605.496861 | 7.3              |
| 3-para-t        | -1605.500493 | 3-para-t-D                          | -1605.493455 | 4.4              |
| 4-anti-t        | -1723.403896 | 4-anti-t-D                          | -1723.387242 | 10.5             |
| 4-para-t        | -1723.401284 | 4-para-t-D                          | -1723.369198 | 20.1             |
| 5-anti-t        | -1841.295834 | 5-anti-t-D                          | -1841.275734 | 12.6             |
| 5-para-t        | -1841.294974 | 5-para-t-D                          | -1841.263008 | 20.1             |

**Table S2.** Relative Gibbs Free Energies ( $G_{\text{rel}}$ , kcal/mol) between antiparallel (anti) and parallel (para) arrangements of optimized trimer structures and the total stabilization energies (kcal/mol).\*

| n-anti/para | $G_{\text{rel}}$ | Total Stabilization Energy |
|-------------|------------------|----------------------------|
| 2-anti-t    | 0.0              | 44.0 (0.0)                 |
| 2-para-t    | 6.6              | 36.1 (7.9)                 |
| 3-anti-t    | 0.0              | 45.9 (0.0)                 |
| 3-para-t    | 5.7              | 42.1 (3.8)                 |
| 4-anti-t    | 0.0              | 48.6 (0.0)                 |
| 4-para-t    | 2.2              | 35.7 (13.0)                |
| 5-anti-t    | 0.0              | 44.3 (0.0)                 |
| 5-para-t    | 1.0              | 41.7 (2.6)                 |
| 6-anti-t    | 0.0              | 56.2 (0.0)                 |
| 6-para-t    | 0.8              | 39.2 (17.1)                |
| 7-anti-t    | 0.0              | 42.8 (0.0)                 |
| 7-para-t    | 0.1              | 41.1 (1.7)                 |
| 8-anti-t    | 0.0              | 48.7 (0.0)                 |
| 8-para-t    | 0.3              | 40.1 (8.6)                 |
| 9-anti-t    | 0.0              | 42.6 (0.0)                 |
| 9-para-t    | 1.3              | 40.9 (1.7)                 |

\*The relative total stabilization energies (kcal/mol) between antiparallel (anti) and parallel (para) arrangements are indicated in parentheses. (B3LYP-D3/6-311+G\*\*//B3LYP/6-311+G\*\*, Solvent = Benzene)

### III. Coordinates and Gibbs Free Energies (a.u) of Dimer and Trimers (B3LYP/6-311+G\*\* (Solvent=Benzene))

#### 2-anti-d

Gibbs Free Energy= -991.744573

|   |             |             |             |
|---|-------------|-------------|-------------|
| C | -1.42331000 | -2.17375100 | -0.61485400 |
| C | -1.94588400 | -1.45422100 | 0.64213100  |
| N | -2.78154200 | -0.31342600 | 0.31096500  |
| N | -0.62178200 | -3.34818700 | -0.28770200 |
| C | -4.10949800 | -0.44450900 | 0.06210800  |
| C | 0.71648400  | -3.30811700 | -0.08648900 |
| O | -4.68649200 | -1.53165100 | 0.08898500  |
| O | 1.36680200  | -2.26489000 | -0.18253700 |
| C | 1.38541000  | -4.62288000 | 0.25537000  |
| C | -4.85049700 | 0.84251000  | -0.24609000 |
| H | -5.63981000 | 0.97710800  | 0.49704800  |
| H | -4.20080200 | 1.71844000  | -0.24578800 |
| H | -2.34898900 | 0.60381800  | 0.26136700  |
| H | -1.10348300 | -1.10322800 | 1.24092800  |
| H | -2.53042800 | -2.15348800 | 1.24344700  |
| H | -1.09693600 | -4.22998000 | -0.17178800 |
| H | 0.69221400  | -5.46389900 | 0.30330100  |
| H | -0.80642800 | -1.49443400 | -1.20390400 |
| H | -2.26673500 | -2.49551700 | -1.22724700 |
| H | 1.88947600  | -4.52069200 | 1.21861300  |
| H | -5.33187900 | 0.74644200  | -1.22175700 |
| H | 2.14915800  | -4.83258200 | -0.49638500 |
| C | 1.94585300  | 1.45413300  | -0.64213700 |
| C | 1.42328900  | 2.17371200  | 0.61482500  |
| N | 0.62177000  | 3.34814200  | 0.28763200  |
| N | 2.78157200  | 0.31339200  | -0.31093600 |
| C | -0.71651400 | 3.30811200  | 0.08652900  |
| C | 4.10952900  | 0.44454800  | -0.06212200 |
| O | -1.36687900 | 2.26492600  | 0.18271000  |
| O | 4.68647000  | 1.53171600  | -0.08905100 |
| C | 4.85059200  | -0.84242100 | 0.24612900  |
| C | -1.38539800 | 4.62286800  | -0.25543900 |
| H | -2.14912300 | 4.83266400  | 0.49631200  |
| H | -0.69217200 | 5.46385700  | -0.30346200 |
| H | 1.09694800  | 4.22990600  | 0.17159300  |
| H | 2.26672200  | 2.49549600  | 1.22719800  |
| H | 0.80640500  | 1.49442600  | 1.20390700  |
| H | 2.34906900  | -0.60387300 | -0.26131700 |
| H | 4.20095100  | -1.71839100 | 0.24582300  |
| H | 2.53034700  | 2.15339200  | -1.24351200 |
| H | 1.10344900  | 1.10307000  | -1.24088900 |
| H | 5.33192900  | -0.74630700 | 1.22181400  |
| H | -1.88948700 | 4.52061200  | -1.21866300 |
| H | 5.63994400  | -0.97698800 | -0.49697400 |

## 2-para-d

Gibbs Free Energy= -991.738179

|   |             |             |             |
|---|-------------|-------------|-------------|
| H | 2.60798900  | -0.89446600 | -1.26126700 |
| C | 1.67509800  | -0.84712800 | -0.69962700 |
| H | 0.96381900  | -0.23325100 | -1.26051100 |
| C | 1.91909000  | -0.20855600 | 0.67993000  |
| H | 1.03054800  | -0.34758200 | 1.30425200  |
| N | 1.14299800  | -2.19592700 | -0.58869900 |
| H | 0.17328000  | -2.28953000 | -0.30808700 |
| C | 1.86432400  | -3.31345800 | -0.86144200 |
| O | 3.03647100  | -3.29165100 | -1.23006600 |
| H | 2.76440500  | -0.68704900 | 1.17386700  |
| N | 2.20622800  | 1.21298500  | 0.57034200  |
| H | 1.44478800  | 1.81681300  | 0.28109700  |
| C | 3.41160700  | 1.76365800  | 0.86655800  |
| O | 4.37898800  | 1.11377500  | 1.25672500  |
| C | 3.49849400  | 3.26981000  | 0.68525900  |
| H | 4.28766400  | 3.48951700  | -0.03718700 |
| H | 3.78913400  | 3.72111200  | 1.63646800  |
| C | 1.12025900  | -4.62627700 | -0.68322200 |
| H | 0.07733400  | -4.49502600 | -0.39032100 |
| H | 1.63489600  | -5.21914600 | 0.07640600  |
| H | 2.56397700  | 3.71834500  | 0.34434500  |
| H | 1.16500700  | -5.18423500 | -1.62092900 |
| H | -2.50216200 | 0.03209300  | -1.04286100 |
| C | -3.33985800 | 0.32414100  | -0.41060700 |
| H | -4.18746900 | 0.57019300  | -1.05679700 |
| C | -2.94939100 | 1.54603700  | 0.44064300  |
| H | -3.76785200 | 1.81129800  | 1.11610800  |
| N | -3.69392700 | -0.82363800 | 0.41240200  |
| H | -4.60369400 | -0.83988600 | 0.84709700  |
| C | -2.86201800 | -1.87866300 | 0.62645300  |
| O | -1.73996500 | -1.94064400 | 0.12857300  |
| H | -2.07256800 | 1.31031400  | 1.04287500  |
| N | -2.62383900 | 2.70374000  | -0.38018400 |
| H | -3.38046500 | 3.23592200  | -0.78159800 |
| C | -1.34983900 | 3.10750100  | -0.63527400 |
| O | -0.37210200 | 2.51803800  | -0.18037200 |
| C | -1.20228900 | 4.33340900  | -1.51120000 |
| H | -0.63239200 | 4.06068900  | -2.40193500 |
| H | -0.62511000 | 5.08430000  | -0.96814600 |
| C | -3.40045100 | -2.98383900 | 1.51011100  |
| H | -4.40573900 | -2.79067900 | 1.88763000  |
| H | -2.72160100 | -3.11824500 | 2.35459100  |
| H | -2.15511000 | 4.76795200  | -1.81710900 |
| H | -3.40618400 | -3.91553300 | 0.94061000  |

### 3-anti-d

Gibbs Free Energy= -1070.338129

|   |             |             |             |
|---|-------------|-------------|-------------|
| C | 0.17685300  | -3.05139800 | -0.85511800 |
| C | 1.20413700  | -2.18125700 | -0.12255600 |
| C | 2.19059300  | -1.52499600 | -1.09804800 |
| N | 3.20324800  | -0.72049600 | -0.43068900 |
| N | -0.77812300 | -3.69082400 | 0.04693100  |
| C | -1.98027000 | -3.15658300 | 0.36514800  |
| C | 4.36045500  | -1.25524800 | 0.02945600  |
| O | 4.63788200  | -2.44971800 | -0.08614900 |
| O | -2.37987600 | -2.09440800 | -0.11793600 |
| C | 5.31496300  | -0.28193700 | 0.69667700  |
| C | -2.82623700 | -3.94380700 | 1.34438200  |
| H | 6.25970000  | -0.28759200 | 0.14819300  |
| H | 4.92811000  | 0.73716400  | 0.73582700  |
| H | 3.01135700  | 0.26569500  | -0.28326500 |
| H | 1.65584800  | -0.87478700 | -1.79595000 |
| H | 0.68078200  | -1.40872700 | 0.44913400  |
| H | 2.70130300  | -2.29494300 | -1.68154100 |
| H | 0.68108300  | -3.83970300 | -1.42076900 |
| H | -0.39944900 | -2.45114600 | -1.56109500 |
| H | 1.76644400  | -2.79328800 | 0.58894200  |
| H | -0.49830400 | -4.54336800 | 0.50702400  |
| H | -3.78097200 | -4.18125800 | 0.87062400  |
| H | -2.35527400 | -4.86901900 | 1.67992800  |
| H | 5.52258600  | -0.63152000 | 1.71044200  |
| H | -3.03547500 | -3.31544200 | 2.21273800  |
| C | -2.19067900 | 1.52487400  | -1.09807400 |
| C | -1.20401400 | 2.18096100  | -0.12267100 |
| C | -0.17674700 | 3.05112200  | -0.85522400 |
| N | 0.77818400  | 3.69052600  | 0.04691000  |
| N | -3.20344300 | 0.72057500  | -0.43065500 |
| C | -4.36059600 | 1.25549700  | 0.02944500  |
| C | 1.98043000  | 3.15652100  | 0.36509900  |
| O | 2.38042100  | 2.09455700  | -0.11815400 |
| O | -4.63797300 | 2.44995400  | -0.08635700 |
| C | 2.82608300  | 3.94372700  | 1.34461800  |
| C | -5.31518400 | 0.28235700  | 0.69682200  |
| H | 3.78115100  | 4.18079100  | 0.87134400  |
| H | 2.35520200  | 4.86913300  | 1.67974100  |
| H | 0.49828300  | 4.54308300  | 0.50693100  |
| H | -0.68099200 | 3.83948400  | -1.42077600 |
| H | -1.76616900 | 2.79294500  | 0.58899500  |
| H | 0.39958000  | 2.45096800  | -1.56125600 |
| H | -1.65614800 | 0.87454300  | -1.79602300 |
| H | -2.70129200 | 2.29490800  | -1.68153800 |
| H | -0.68064600 | 1.40832700  | 0.44886000  |
| H | -3.01163000 | -0.26562400 | -0.28317900 |
| H | -6.25986300 | 0.28791600  | 0.14824500  |
| H | -4.92837300 | -0.73674600 | 0.73627100  |
| H | 3.03465700  | 3.31547900  | 2.21322000  |
| H | -5.52291100 | 0.63218300  | 1.71048800  |

### 3-para-d

Gibbs Free Energy= -1.070.334846

|   |             |             |             |
|---|-------------|-------------|-------------|
| C | 1.26944000  | -3.35624300 | -0.85688500 |
| C | 0.00166300  | -3.31621100 | 0.00587400  |
| C | -1.26682300 | -3.35735500 | -0.85579000 |
| N | -2.49454900 | -3.31380700 | -0.06837900 |
| N | 2.49784400  | -3.31206700 | -0.07054700 |
| C | -3.16141500 | -2.16433300 | 0.20679200  |
| C | 3.16336700  | -2.16204100 | 0.20550700  |
| C | -4.40667400 | -2.30182200 | 1.05743100  |
| C | 4.40961800  | -2.29887900 | 1.05480300  |
| O | 2.78295800  | -1.06874000 | -0.21291200 |
| O | -2.78305200 | -1.07106600 | -0.21355700 |
| H | -5.25025900 | -1.86855600 | 0.51664500  |
| H | -4.64292100 | -3.33455000 | 1.31832900  |
| H | 2.84733400  | -4.17218000 | 0.32251100  |
| H | 0.00233800  | -4.16338900 | 0.70116000  |
| H | -1.28793600 | -2.50264800 | -1.53340000 |
| H | -2.84241500 | -4.17385900 | 0.32625500  |
| H | -1.28820800 | -4.26657600 | -1.46371500 |
| H | 1.29097900  | -4.26527900 | -1.46506700 |
| H | 1.28930400  | -2.50133000 | -1.53428700 |
| H | 5.25181800  | -1.86246600 | 0.51440500  |
| H | 4.64828700  | -3.33172000 | 1.31303500  |
| H | 0.00152900  | -2.40148700 | 0.60437500  |
| H | -4.27131900 | -1.72590500 | 1.97550200  |
| H | 4.27374900  | -1.72548400 | 1.97438800  |
| C | 1.27040200  | 2.24782300  | -1.06811500 |
| C | -0.00083100 | 1.97089200  | -0.25561100 |
| C | -1.27200300 | 2.24674200  | -1.06856500 |
| N | -2.48961000 | 1.90148100  | -0.34684500 |
| N | 2.48804600  | 1.90350300  | -0.34603300 |
| C | -3.32338700 | 2.82681200  | 0.18902900  |
| C | 3.32070000  | 2.82944500  | 0.19053200  |
| C | -4.53794100 | 2.26907900  | 0.91197600  |
| C | 4.53546700  | 2.27261800  | 0.91382600  |
| O | 3.13427000  | 4.04266500  | 0.10714000  |
| O | -3.13803900 | 4.04018900  | 0.10541300  |
| H | -5.43931100 | 2.65384000  | 0.42948500  |
| H | -4.57150200 | 1.17865200  | 0.91879100  |
| H | 2.70298700  | 0.91822700  | -0.22899700 |
| H | -0.00042400 | 0.92509000  | 0.07076400  |
| H | -1.33654300 | 3.30401100  | -1.32940400 |
| H | -2.70385900 | 0.91605500  | -0.22980200 |
| H | -1.25006700 | 1.67163300  | -2.00090200 |
| H | 1.24928800  | 1.67273700  | -2.00048400 |
| H | 1.33415600  | 3.30515700  | -1.32889600 |
| H | 5.43670400  | 2.65723800  | 0.43095800  |
| H | 4.56934100  | 1.18220500  | 0.92146100  |
| H | -0.00125900 | 2.59339700  | 0.64421900  |
| H | -4.53341600 | 2.63776200  | 1.94012200  |
| H | 4.53092400  | 2.64211700  | 1.94167100  |



## 2-anti-t

Gibbs Free Energy= -1487.616597

|   |             |             |             |
|---|-------------|-------------|-------------|
| C | 4.89830600  | 0.86110300  | -0.60616300 |
| C | 4.89706000  | -0.03426900 | 0.64673000  |
| N | 4.71421800  | -1.43585400 | 0.31581100  |
| N | 5.15897500  | 2.26034700  | -0.28498000 |
| C | 5.76078900  | -2.23717600 | -0.00628000 |
| C | 4.19132900  | 3.16534600  | -0.01108500 |
| O | 6.92244500  | -1.83014300 | -0.04671600 |
| O | 2.99063000  | 2.88211300  | -0.03295400 |
| C | 4.65868900  | 4.56825300  | 0.31551700  |
| C | 5.41342500  | -3.68281000 | -0.30610700 |
| H | 5.93416000  | -4.32219400 | 0.41063200  |
| H | 4.34240100  | -3.88177300 | -0.25571900 |
| H | 3.77002800  | -1.81294600 | 0.31298900  |
| H | 4.09185600  | 0.27214500  | 1.31716300  |
| H | 5.84739100  | 0.07905200  | 1.17228100  |
| H | 6.12023000  | 2.55862200  | -0.22266400 |
| H | 5.74463300  | 4.67228800  | 0.32663100  |
| H | 3.93398800  | 0.80147300  | -1.11127900 |
| H | 5.67138400  | 0.51957800  | -1.29607400 |
| H | 4.26223800  | 4.85262600  | 1.29218300  |
| H | 5.78583800  | -3.93523700 | -1.30123800 |
| H | 4.24301300  | 5.25690600  | -0.42329300 |
| C | 0.07895800  | 0.42025900  | -0.63958400 |
| C | -0.07748600 | -0.42235600 | 0.63991200  |
| N | -0.26716800 | -1.83589300 | 0.34905800  |
| N | 0.26830600  | 1.83384500  | -0.34874000 |
| C | 0.76389500  | -2.69346700 | 0.20141300  |
| C | -0.76309600 | 2.69081900  | -0.19988800 |
| O | 1.94565600  | -2.34007200 | 0.30219200  |
| O | -1.94470600 | 2.33673900  | -0.29993800 |
| C | -0.39772600 | 4.13137600  | 0.09014700  |
| C | 0.39799700  | -4.13398800 | -0.08814100 |
| H | 0.81160600  | -4.76459600 | 0.70233100  |
| H | -0.67865500 | -4.29132400 | -0.15322100 |
| H | -1.21647100 | -2.18411300 | 0.24225500  |
| H | -0.94245500 | -0.07002500 | 1.20454000  |
| H | 0.81025900  | -0.30994100 | 1.26424000  |
| H | 1.21748300  | 2.18249300  | -0.24224000 |
| H | 0.67891500  | 4.28926800  | 0.15409000  |
| H | -0.80870200 | 0.30762100  | -1.26399800 |
| H | 0.94404800  | 0.06810400  | -1.20414200 |
| H | -0.86696000 | 4.43043600  | 1.03017100  |
| H | 0.86817400  | -4.43397100 | -1.02739200 |
| H | -0.81266800 | 4.76226800  | -0.69939600 |
| C | -4.89728500 | 0.03536700  | -0.64721800 |
| C | -4.89896300 | -0.85978700 | 0.60582900  |
| N | -5.15930400 | -2.25912000 | 0.28471300  |
| N | -4.71480300 | 1.43705400  | -0.31651700 |
| C | -4.19142600 | -3.16392500 | 0.01100400  |
| C | -5.76159000 | 2.23829500  | 0.00503000  |
| O | -2.99080500 | -2.88038000 | 0.03292400  |
| O | -6.92324000 | 1.83118300  | 0.04489600  |
| C | -5.41456300 | 3.68404100  | 0.30474200  |
| C | -4.65844900 | -4.56691800 | -0.31572200 |
| H | -4.24123700 | -5.25578800 | 0.42200300  |
| H | -5.74434800 | -4.67157800 | -0.32531800 |
| H | -6.12047900 | -2.55768400 | 0.22260600  |
| H | -5.67240700 | -0.51829900 | 1.29534300  |
| H | -3.93486200 | -0.79993000 | 1.11133300  |
| H | -3.77055200 | 1.81397100  | -0.31264300 |
| H | -4.34347100 | 3.88300000  | 0.25577200  |
| H | -5.84733500 | -0.07819700 | -1.17322000 |
| H | -4.09168700 | -0.27103700 | -1.31717600 |
| H | -5.78840500 | 3.93694000  | 1.29920800  |
| H | -4.26331400 | -4.85044300 | -1.29318100 |
| H | -5.93421400 | 4.32313200  | -0.41305300 |

## 2-para-t

Gibbs Free Energy= -1487.608113

|   |             |             |             |
|---|-------------|-------------|-------------|
| H | 5.48054700  | 0.13127400  | -1.01279600 |
| C | 4.49398900  | -0.17563400 | -0.66577300 |
| H | 3.74050300  | 0.27527600  | -1.31861500 |
| C | 4.26528200  | 0.30627200  | 0.77931800  |
| H | 3.37821600  | -0.18913900 | 1.18629600  |
| N | 4.40019700  | -1.62289800 | -0.77556800 |
| H | 3.47056700  | -2.02764800 | -0.71743700 |
| C | 5.46492700  | -2.43356500 | -0.99444400 |
| O | 6.61966200  | -2.02727000 | -1.11383300 |
| H | 5.12082800  | 0.04803300  | 1.40331200  |
| N | 4.07202400  | 1.74590000  | 0.84598600  |
| H | 3.18944600  | 2.11336800  | 0.50438500  |
| C | 4.98437800  | 2.60552000  | 1.36506400  |
| O | 6.06421700  | 2.25140800  | 1.83572800  |
| C | 4.58252300  | 4.07061800  | 1.33313900  |
| H | 5.33208300  | 4.62530100  | 0.76412800  |
| H | 4.59202600  | 4.45893500  | 2.35409300  |
| C | 5.14184000  | -3.91568900 | -1.09142400 |
| H | 4.08105200  | -4.13493100 | -0.96023900 |
| H | 5.71808400  | -4.44950700 | -0.33253000 |
| H | 3.59872000  | 4.23579700  | 0.89158700  |
| H | 5.46672100  | -4.28160100 | -2.06809400 |
| H | 0.17573300  | -0.34597700 | -1.48897000 |
| C | -0.67111600 | -0.46698100 | -0.81337400 |
| H | -1.59250200 | -0.29847400 | -1.37579700 |
| C | -0.58020700 | 0.55669800  | 0.33398300  |
| H | -1.33843500 | 0.32444000  | 1.08650600  |
| N | -0.68267800 | -1.83790000 | -0.32417700 |
| H | -1.57362100 | -2.20660600 | -0.00597000 |
| C | 0.41787300  | -2.61913500 | -0.27269400 |
| O | 1.53073400  | -2.23448400 | -0.64427500 |
| H | 0.40111900  | 0.50648600  | 0.80481600  |
| N | -0.79766100 | 1.91688200  | -0.13500900 |
| H | -1.75716300 | 2.18760400  | -0.32726900 |
| C | 0.19145500  | 2.82110600  | -0.30847900 |
| O | 1.38051200  | 2.57618200  | -0.08635800 |
| C | -0.24365100 | 4.19006200  | -0.79394200 |
| H | 0.29975900  | 4.42635500  | -1.71114100 |
| H | 0.03740700  | 4.93341200  | -0.04440300 |
| C | 0.21277700  | -4.02103500 | 0.26617000  |
| H | -0.82228000 | -4.22749600 | 0.54130300  |
| H | 0.85238900  | -4.15852400 | 1.14084600  |
| H | -1.31607000 | 4.25786400  | -0.98122400 |
| H | 0.53378600  | -4.73857500 | -0.49204100 |
| H | -4.99011500 | -0.89967700 | -0.89370000 |
| C | -5.81156300 | -0.85815900 | -0.17899200 |
| H | -6.75196200 | -0.92415000 | -0.73268900 |
| C | -5.75017800 | 0.46571500  | 0.60508800  |
| H | -6.53059000 | 0.48580900  | 1.37054500  |
| N | -5.70553200 | -2.01941700 | 0.69411700  |
| H | -6.53815000 | -2.34873400 | 1.15793300  |
| C | -4.54232900 | -2.68677500 | 0.91363800  |
| O | -3.48509700 | -2.34717400 | 0.38415800  |
| H | -4.78327000 | 0.55590100  | 1.09896400  |
| N | -5.91816900 | 1.62368000  | -0.26223900 |
| H | -6.85252000 | 1.88290300  | -0.53918400 |
| C | -4.88292800 | 2.37848100  | -0.71593200 |
| O | -3.71448500 | 2.13039800  | -0.42198300 |
| C | -5.24940000 | 3.55289800  | -1.59763800 |
| H | -4.70822000 | 3.46611800  | -2.54173100 |
| H | -4.91862200 | 4.47282000  | -1.11059900 |
| C | -4.62027600 | -3.88093500 | 1.83998700  |
| H | -5.61852800 | -4.05451300 | 2.24400800  |
| H | -3.92187900 | -3.73127100 | 2.66577300  |
| H | -6.31813700 | 3.62563100  | -1.80400700 |
| H | -4.29890200 | -4.76951300 | 1.29252000  |

### 3-anti-t

Gibbs Free Energy= -1605.50847

|   |             |             |             |   |             |             |             |
|---|-------------|-------------|-------------|---|-------------|-------------|-------------|
| C | 0.09757900  | -1.26578500 | 1.55069000  | H | -4.00438100 | -5.09682600 | -2.52385700 |
| C | -0.00001800 | 0.00031000  | 0.68985200  | H | -6.24251000 | 3.53737400  | -1.63726700 |
| C | -0.09861700 | 1.26620000  | 1.55087600  | H | -2.32815400 | -4.51448100 | -2.62359800 |
| N | -0.21698200 | 2.48621000  | 0.76112300  |   |             |             |             |
| N | 0.21694700  | -2.48560900 | 0.76080100  |   |             |             |             |
| C | 1.40622800  | -3.01142800 | 0.40846600  |   |             |             |             |
| C | -1.40580400 | 3.01224800  | 0.40756600  |   |             |             |             |
| O | -2.48692400 | 2.50612100  | 0.73651400  |   |             |             |             |
| O | 2.48691000  | -2.50512800 | 0.73859500  |   |             |             |             |
| C | -1.35306400 | 4.28304900  | -0.41602200 |   |             |             |             |
| C | 1.35459900  | -4.28225400 | -0.41514900 |   |             |             |             |
| H | -1.88502000 | 5.07156200  | 0.12112000  |   |             |             |             |
| H | -0.33412900 | 4.61221900  | -0.62125900 |   |             |             |             |
| H | 0.63795900  | 2.93213500  | 0.43797400  |   |             |             |             |
| H | 0.78996300  | 1.36386000  | 2.18050400  |   |             |             |             |
| H | 0.88029500  | 0.06352300  | 0.04306900  |   |             |             |             |
| H | -0.96949300 | 1.20835400  | 2.20699900  |   |             |             |             |
| H | -0.79175200 | -1.36362900 | 2.17922800  |   |             |             |             |
| H | 0.96765800  | -1.20803700 | 2.20787500  |   |             |             |             |
| H | -0.87954800 | -0.06275200 | 0.04198700  |   |             |             |             |
| H | -0.63760200 | -2.93170500 | 0.43686600  |   |             |             |             |
| H | 1.88449400  | -5.07116200 | 0.12346600  |   |             |             |             |
| H | 0.33595700  | -4.61067300 | -0.62303400 |   |             |             |             |
| H | -1.87744700 | 4.11515700  | -1.35955400 |   |             |             |             |
| H | 1.88161300  | -4.11486900 | -1.35729400 |   |             |             |             |
| C | 5.22414000  | -0.03330000 | 0.89695300  |   |             |             |             |
| C | 4.84151400  | 0.98360400  | -0.18727600 |   |             |             |             |
| C | 4.91944000  | 2.42347400  | 0.33161300  |   |             |             |             |
| N | 4.55239700  | 3.41447700  | -0.67796800 |   |             |             |             |
| N | 5.17422800  | -1.40961000 | 0.42818900  |   |             |             |             |
| C | 6.24519900  | -2.01940900 | -0.13377400 |   |             |             |             |
| C | 3.30101600  | 3.90571000  | -0.82419500 |   |             |             |             |
| O | 2.37214000  | 3.57983000  | -0.07964600 |   |             |             |             |
| O | 7.33410400  | -1.46231000 | -0.28301500 |   |             |             |             |
| C | 3.09670800  | 4.89820200  | -1.94993300 |   |             |             |             |
| C | 6.02814800  | -3.45747500 | -0.56859400 |   |             |             |             |
| H | 2.73196900  | 5.83708500  | -1.52805400 |   |             |             |             |
| H | 4.00261500  | 5.09509700  | -2.52504700 |   |             |             |             |
| H | 5.25503000  | 3.69418400  | -1.34504100 |   |             |             |             |
| H | 5.93344800  | 2.65223900  | 0.67065800  |   |             |             |             |
| H | 5.51494600  | 0.86141600  | -1.04104100 |   |             |             |             |
| H | 4.24578700  | 2.56182600  | 1.17872700  |   |             |             |             |
| H | 4.54631600  | 0.05416800  | 1.75064000  |   |             |             |             |
| H | 6.23872500  | 0.16473500  | 1.25024200  |   |             |             |             |
| H | 3.82500000  | 0.78110000  | -0.53812000 |   |             |             |             |
| H | 4.28832700  | -1.90509000 | 0.49600100  |   |             |             |             |
| H | 6.74218900  | -4.09371900 | -0.04082400 |   |             |             |             |
| H | 5.01596800  | -3.81442100 | -0.37380700 |   |             |             |             |
| H | 2.32536400  | 4.51510800  | -2.62139800 |   |             |             |             |
| H | 6.24320500  | -3.53918000 | -1.63645300 |   |             |             |             |
| C | -4.91894300 | -2.42381600 | 0.33227700  |   |             |             |             |
| C | -4.84168800 | -0.98409000 | -0.18711200 |   |             |             |             |
| C | -5.22349300 | 0.03308900  | 0.89714700  |   |             |             |             |
| N | -5.17401700 | 1.40926800  | 0.42796700  |   |             |             |             |
| N | -4.55265000 | -3.41508300 | -0.67731900 |   |             |             |             |
| C | -3.30122600 | -3.90583000 | -0.82477200 |   |             |             |             |
| C | -6.24545300 | 2.01886700  | -0.13333700 |   |             |             |             |
| O | -7.33448400 | 1.46171700  | -0.28146900 |   |             |             |             |
| O | -2.37166300 | -3.57934100 | -0.08134700 |   |             |             |             |
| C | -6.02865800 | 3.45669400  | -0.56907400 |   |             |             |             |
| C | -3.09767000 | -4.89845100 | -1.95052400 |   |             |             |             |
| H | -6.74364200 | 4.09300500  | -0.04269100 |   |             |             |             |
| H | -5.01684900 | 3.81426400  | -0.37351700 |   |             |             |             |
| H | -4.28812800 | 1.90485600  | 0.49496300  |   |             |             |             |
| H | -4.54498500 | -0.05412500 | 1.75032000  |   |             |             |             |
| H | -3.82551300 | -0.78154600 | -0.53890900 |   |             |             |             |
| H | -6.23778600 | -0.16488300 | 1.25130900  |   |             |             |             |
| H | -5.93260800 | -2.65264600 | 0.67229800  |   |             |             |             |
| H | -4.24451400 | -2.56180000 | 1.17883400  |   |             |             |             |
| H | -5.51588700 | -0.86224700 | -1.04032200 |   |             |             |             |
| H | -5.25584700 | -3.69516900 | -1.34364100 |   |             |             |             |
| H | -2.73077100 | -5.83664500 | -1.52900800 |   |             |             |             |

### 3-para-t

Gibbs Free Energy= -1605.500493

|   |             |             |             |   |             |             |             |
|---|-------------|-------------|-------------|---|-------------|-------------|-------------|
| C | -0.44230500 | 1.44760100  | 1.36444700  | H | -4.87949700 | 0.02450900  | -0.84528300 |
| C | -0.62224800 | 0.15387300  | 0.56077900  | H | -4.39894800 | -4.37919100 | -2.30583800 |
| C | -0.56176400 | -1.09099000 | 1.45524000  | H | -4.30729400 | 4.39532000  | -2.05407200 |
| N | -0.76838700 | -2.32675400 | 0.71108900  |   |             |             |             |
| N | -0.61510200 | 2.64079700  | 0.54665400  |   |             |             |             |
| C | 0.24765200  | -3.11623100 | 0.30095100  |   |             |             |             |
| C | 0.41249600  | 3.39406400  | 0.10230000  |   |             |             |             |
| C | -0.14713900 | -4.34438700 | -0.49380200 |   |             |             |             |
| C | 0.03481900  | 4.59303600  | -0.74535900 |   |             |             |             |
| O | 1.59496800  | 3.15131500  | 0.36708100  |   |             |             |             |
| O | 1.43114300  | -2.87180900 | 0.56061400  |   |             |             |             |
| H | 0.18503000  | -5.23338500 | 0.04757800  |   |             |             |             |
| H | -1.22157300 | -4.40749100 | -0.66804300 |   |             |             |             |
| H | -1.56277800 | 2.88118700  | 0.27197100  |   |             |             |             |
| H | -1.58693800 | 0.18205800  | 0.04312100  |   |             |             |             |
| H | 0.40946000  | -1.16105100 | 1.94662700  |   |             |             |             |
| H | -1.71527600 | -2.55716700 | 0.42725300  |   |             |             |             |
| H | -1.32835600 | -1.03116700 | 2.23467000  |   |             |             |             |
| H | -1.17150600 | 1.48722500  | 2.18039600  |   |             |             |             |
| H | 0.55481300  | 1.49061900  | 1.80441900  |   |             |             |             |
| H | 0.36243400  | 5.50106000  | -0.23362300 |   |             |             |             |
| H | -1.03637000 | 4.65913900  | -0.94006300 |   |             |             |             |
| H | 0.15565300  | 0.08916100  | -0.20544800 |   |             |             |             |
| H | 0.37695300  | -4.32634000 | -1.45172800 |   |             |             |             |
| H | 0.57182100  | 4.53741400  | -1.69434500 |   |             |             |             |
| C | 4.86551500  | 1.16483400  | 0.87220100  |   |             |             |             |
| C | 4.44279400  | -0.10394600 | 0.11939900  |   |             |             |             |
| C | 4.81488000  | -1.37507000 | 0.89456600  |   |             |             |             |
| N | 4.34677600  | -2.59234400 | 0.24681800  |   |             |             |             |
| N | 4.46527900  | 2.39099300  | 0.19629300  |   |             |             |             |
| C | 5.16915200  | -3.44857500 | -0.40589200 |   |             |             |             |
| C | 5.33450300  | 3.17823800  | -0.48413100 |   |             |             |             |
| C | 4.48947500  | -4.66248600 | -1.01732100 |   |             |             |             |
| C | 4.72817400  | 4.41802600  | -1.11883100 |   |             |             |             |
| O | 6.53620700  | 2.93204500  | -0.59059900 |   |             |             |             |
| O | 6.38517100  | -3.28362700 | -0.50853900 |   |             |             |             |
| H | 4.93533600  | -5.56435900 | -0.59150100 |   |             |             |             |
| H | 3.41172800  | -4.67992300 | -0.84896000 |   |             |             |             |
| H | 3.48683100  | 2.66229600  | 0.23436000  |   |             |             |             |
| H | 3.36010900  | -0.08504200 | -0.04633500 |   |             |             |             |
| H | 5.89829500  | -1.45485300 | 0.99540000  |   |             |             |             |
| H | 3.35112900  | -2.79445800 | 0.28341800  |   |             |             |             |
| H | 4.38520300  | -1.33412700 | 1.90176400  |   |             |             |             |
| H | 4.42395800  | 1.16528500  | 1.87506900  |   |             |             |             |
| H | 5.95042300  | 1.19381400  | 0.98443900  |   |             |             |             |
| H | 5.24161700  | 5.29771100  | -0.72397100 |   |             |             |             |
| H | 3.65731600  | 4.51035000  | -0.93422300 |   |             |             |             |
| H | 4.92304000  | -0.12198400 | -0.86311700 |   |             |             |             |
| H | 4.68934300  | -4.67249500 | -2.09107400 |   |             |             |             |
| H | 4.91242600  | 4.38604500  | -2.19510500 |   |             |             |             |
| C | -5.71134900 | 1.23420800  | 0.73913400  |   |             |             |             |
| C | -5.73371900 | -0.00637100 | -0.16367000 |   |             |             |             |
| C | -5.68605800 | -1.30222700 | 0.65632000  |   |             |             |             |
| N | -5.76466100 | -2.50167400 | -0.16977400 |   |             |             |             |
| N | -5.74237100 | 2.48520900  | -0.01085900 |   |             |             |             |
| C | -4.69114800 | -3.25461100 | -0.51774000 |   |             |             |             |
| C | -4.63118600 | 3.19953400  | -0.31819100 |   |             |             |             |
| C | -4.97766100 | -4.46325100 | -1.38381800 |   |             |             |             |
| C | -4.84945900 | 4.47167300  | -1.10912800 |   |             |             |             |
| O | -3.50476100 | 2.84090900  | 0.02798100  |   |             |             |             |
| O | -3.54554700 | -2.98609100 | -0.15398500 |   |             |             |             |
| H | -4.63551600 | -5.35788400 | -0.85960000 |   |             |             |             |
| H | -6.03305700 | -4.57987400 | -1.63497900 |   |             |             |             |
| H | -6.63286100 | 2.82214200  | -0.34266600 |   |             |             |             |
| H | -6.64164400 | 0.00530600  | -0.77745000 |   |             |             |             |
| H | -4.75458000 | -1.36046200 | 1.22047000  |   |             |             |             |
| H | -6.66922700 | -2.77651900 | -0.52054700 |   |             |             |             |
| H | -6.51181700 | -1.32927700 | 1.37393400  |   |             |             |             |
| H | -6.56766200 | 1.22592900  | 1.41984300  |   |             |             |             |
| H | -4.80466700 | 1.24531100  | 1.34539100  |   |             |             |             |
| H | -4.42433000 | 5.30793600  | -0.55067000 |   |             |             |             |
| H | -5.89972900 | 4.68007100  | -1.31818100 |   |             |             |             |

#### 4-anti-t

Gibbs Free Energy= -1723.403896

|   |             |             |             |   |             |             |             |
|---|-------------|-------------|-------------|---|-------------|-------------|-------------|
| C | -0.00330600 | 0.72186200  | 0.25465300  | H | -3.87227600 | -2.55668800 | 1.34076400  |
| C | -0.16779300 | 1.74011700  | -0.88127500 | H | -4.03618600 | -0.05201000 | 0.77211500  |
| C | 0.00347900  | -0.72241800 | -0.25472400 | H | -6.11461100 | 0.64885000  | -1.36382100 |
| C | 0.16819900  | -1.74058000 | 0.88124900  | H | -4.22427000 | 2.62878300  | -0.28039500 |
| N | 0.16420300  | -3.12346900 | 0.41964300  | H | -5.78255900 | -0.12188700 | 0.97895400  |
| N | -0.16392000 | 3.12296300  | -0.41947800 | H | -5.62349400 | -2.64208600 | 1.53416700  |
| C | 1.28998800  | -3.79616300 | 0.10809100  | H | -6.61505800 | 4.93049700  | -0.11454300 |
| C | -1.28976800 | 3.79550700  | -0.10792000 | H | -4.98540100 | 4.55218600  | 0.49819000  |
| O | 2.41879600  | -3.29728500 | 0.19960100  | H | -4.17469600 | -1.80240500 | -1.03049500 |
| O | -2.41854600 | 3.29654400  | -0.19951800 | H | -4.36439900 | 0.69893600  | -1.60635500 |
| C | 1.10247100  | -5.22500200 | -0.36020300 | H | -6.42116100 | 4.32929400  | 1.52980700  |
| C | -1.10240000 | 5.22431000  | 0.36053200  | H | -3.35395800 | -6.23161800 | -1.51204900 |
| H | -0.73410900 | -3.58424400 | 0.30495900  |   |             |             |             |
| H | 0.05506000  | -5.52625500 | -0.39185600 |   |             |             |             |
| H | 1.65042500  | -5.88906600 | 0.31217400  |   |             |             |             |
| H | -0.92948000 | -0.93268800 | -0.79042600 |   |             |             |             |
| H | 1.10896400  | -1.56590600 | 1.40663100  |   |             |             |             |
| H | 0.92957400  | 0.93208700  | 0.79052000  |   |             |             |             |
| H | -1.10842300 | 1.56549000  | -1.40690400 |   |             |             |             |
| H | 0.73434300  | 3.58386400  | -0.30486800 |   |             |             |             |
| H | -0.81819400 | 0.86291300  | 0.97323100  |   |             |             |             |
| H | -0.64415400 | -1.62962300 | 1.60508200  |   |             |             |             |
| H | -0.05498700 | 5.52551800  | 0.39261600  |   |             |             |             |
| H | -1.54083600 | 5.32932200  | 1.35551500  |   |             |             |             |
| H | 0.81825400  | -0.86346500 | -0.97343600 |   |             |             |             |
| H | 0.64474200  | 1.62926500  | -1.60491700 |   |             |             |             |
| H | -1.65006100 | 5.88845000  | -0.31201400 |   |             |             |             |
| H | 1.54051200  | -5.33009100 | -1.35535700 |   |             |             |             |
| C | 4.98178200  | 1.67673600  | 0.30066300  |   |             |             |             |
| C | 4.80948000  | 2.72145000  | -0.80809300 |   |             |             |             |
| C | 4.97780600  | 0.24610400  | -0.24616800 |   |             |             |             |
| C | 5.15752500  | -0.80268100 | 0.86034400  |   |             |             |             |
| N | 5.12745800  | -2.17085700 | 0.36540800  |   |             |             |             |
| N | 4.78724400  | 4.09492800  | -0.30848800 |   |             |             |             |
| C | 6.24734900  | -2.83063000 | -0.01655600 |   |             |             |             |
| C | 3.65101200  | 4.76551600  | -0.00835500 |   |             |             |             |
| O | 7.37304000  | -2.33206700 | 0.03418600  |   |             |             |             |
| O | 2.53075500  | 4.27332900  | -0.16528400 |   |             |             |             |
| C | 6.03372700  | -4.24980300 | -0.51147800 |   |             |             |             |
| C | 3.82196100  | 6.17205600  | 0.52682300  |   |             |             |             |
| H | 4.22435800  | -2.62884100 | 0.28044000  |   |             |             |             |
| H | 4.98571300  | -4.55166000 | -0.49926000 |   |             |             |             |
| H | 6.61444000  | -4.93010200 | 0.11571800  |   |             |             |             |
| H | 4.03585500  | 0.05214300  | -0.77217500 |   |             |             |             |
| H | 6.11413700  | -0.64851800 | 1.36396400  |   |             |             |             |
| H | 5.92136300  | 1.86710200  | 0.83284900  |   |             |             |             |
| H | 3.87189500  | 2.55694400  | -1.34079000 |   |             |             |             |
| H | 5.66916100  | 4.54811800  | -0.12500400 |   |             |             |             |
| H | 4.17417700  | 1.80257000  | 1.03041500  |   |             |             |             |
| H | 4.36389700  | -0.69894300 | 1.60619400  |   |             |             |             |
| H | 3.29456400  | 6.86452100  | -0.13251800 |   |             |             |             |
| H | 4.86455800  | 6.48290900  | 0.60868300  |   |             |             |             |
| H | 5.78223600  | 0.12211400  | -0.97893100 |   |             |             |             |
| H | 5.62312900  | 2.64212700  | -1.53419200 |   |             |             |             |
| H | 3.35400500  | 6.23238700  | 1.51164300  |   |             |             |             |
| H | 6.42288800  | -4.32950300 | -1.52912900 |   |             |             |             |
| C | -4.97817200 | -0.24591900 | 0.24615000  |   |             |             |             |
| C | -5.15788500 | 0.80285200  | -0.86037400 |   |             |             |             |
| C | -4.98223500 | -1.67655500 | -0.30067100 |   |             |             |             |
| C | -4.80984000 | -2.72128200 | 0.80805800  |   |             |             |             |
| N | -4.78742600 | -4.09472600 | 0.30839500  |   |             |             |             |
| N | -5.12750900 | 2.17105100  | -0.36549700 |   |             |             |             |
| C | -3.65108800 | -4.76519300 | 0.00832200  |   |             |             |             |
| C | -6.24725600 | 2.83106000  | 0.01642100  |   |             |             |             |
| O | -2.53089400 | -4.27298300 | 0.16559700  |   |             |             |             |
| O | -7.37308300 | 2.33279600  | -0.03447300 |   |             |             |             |
| C | -3.82186200 | -6.17162500 | -0.52718100 |   |             |             |             |
| C | -6.03333400 | 4.25010300  | 0.51159400  |   |             |             |             |
| H | -5.66927500 | -4.54790700 | 0.12453100  |   |             |             |             |
| H | -4.86441400 | -6.48263200 | -0.60907500 |   |             |             |             |
| H | -3.29432200 | -6.86418400 | 0.13194400  |   |             |             |             |
| H | -5.92186700 | -1.86689900 | -0.83277700 |   |             |             |             |

#### 4-para-t

Gibbs Free Energy= -1723.401284

|   |             |             |             |   |             |             |             |
|---|-------------|-------------|-------------|---|-------------|-------------|-------------|
| C | 4.57506600  | 1.57503500  | -1.13310600 | H | -6.70514600 | -0.51815200 | -1.00652900 |
| C | 4.55069000  | 0.74059500  | 0.15473700  | H | -6.66657200 | -3.35300200 | -0.80562300 |
| C | 4.53306600  | -0.76549100 | -0.12276400 | H | -4.88284400 | -1.89860600 | 1.03676900  |
| C | 4.48603900  | -1.59922500 | 1.16469500  | H | -4.85430800 | 0.67841000  | 1.13325700  |
| N | 4.32416200  | -3.02510400 | 0.91555400  | H | -6.61127700 | 0.66807900  | 1.22595900  |
| N | 4.43620500  | 3.00468200  | -0.89009300 | H | -6.64678700 | -1.90390600 | 1.08672400  |
| C | 5.34107100  | -3.91589600 | 1.00716200  | H | -5.67306900 | 5.26366000  | 2.06660500  |
| C | 5.48500200  | 3.86132300  | -0.88005300 | H | -4.96930800 | 2.03844200  | -0.97082900 |
| O | 6.49026300  | -3.60629700 | 1.32371600  | H | -4.94664800 | -0.53097100 | -1.06050500 |
| O | 6.64768600  | 3.51567300  | -1.09344800 | H | -4.27819900 | -4.79376600 | -2.56666000 |
| C | 4.97377100  | -5.35664000 | 0.69451000  | H | -4.30370400 | 5.93791800  | 1.15707700  |
| C | 5.13979900  | 5.31252400  | -0.58974700 | H | -4.00102700 | 4.92476400  | 2.56725600  |
| H | 5.21801500  | -5.97611000 | 1.56045300  | H | -4.47048000 | -5.81640600 | -1.14418000 |
| H | 3.50309100  | 3.35544300  | -0.69654500 |   |             |             |             |
| H | 3.75698900  | 1.26389500  | -1.79081000 |   |             |             |             |
| H | 3.65968300  | -1.01455700 | -0.73771600 |   |             |             |             |
| H | 3.40253800  | -3.35401900 | 0.64454900  |   |             |             |             |
| H | 5.40670800  | -1.46712800 | 1.73469500  |   |             |             |             |
| H | 5.42236200  | 1.00379700  | 0.76382300  |   |             |             |             |
| H | 3.66276700  | 1.01679300  | 0.73624700  |   |             |             |             |
| H | 3.65210400  | -1.26513400 | 1.79168600  |   |             |             |             |
| H | 4.07253900  | 5.47803600  | -0.43515100 |   |             |             |             |
| H | 5.51381900  | 1.41875600  | -1.66666600 |   |             |             |             |
| H | 5.41799800  | -1.05549800 | -0.69977400 |   |             |             |             |
| H | 3.92000400  | -5.48431600 | 0.44294500  |   |             |             |             |
| H | 5.48357300  | 5.92811300  | -1.42398100 |   |             |             |             |
| H | 5.68694600  | 5.63117900  | 0.30051100  |   |             |             |             |
| H | 5.58944000  | -5.70127200 | -0.13959000 |   |             |             |             |
| C | -0.56701500 | 1.77229800  | -0.84504400 |   |             |             |             |
| C | -0.48210600 | 0.67706700  | 0.22612300  |   |             |             |             |
| C | -0.53089200 | -0.72979600 | -0.37687200 |   |             |             |             |
| C | -0.47514000 | -1.82859600 | 0.69205300  |   |             |             |             |
| N | -0.65151500 | -3.16574200 | 0.13862000  |   |             |             |             |
| N | -0.64419900 | 3.11634900  | -0.28511500 |   |             |             |             |
| C | 0.36576700  | -4.02704600 | -0.06950400 |   |             |             |             |
| C | 0.43191100  | 3.91323300  | -0.12391200 |   |             |             |             |
| O | 1.54174700  | -3.76633700 | 0.20702200  |   |             |             |             |
| O | 1.57438000  | 3.57514400  | -0.45299500 |   |             |             |             |
| C | -0.01275600 | -5.36887500 | -0.66583300 |   |             |             |             |
| C | 0.16667200  | 5.27557200  | 0.48637100  |   |             |             |             |
| H | 0.54592600  | -5.51134500 | -1.59336900 |   |             |             |             |
| H | -1.55839500 | 3.43929100  | 0.01786600  |   |             |             |             |
| H | -1.45707400 | 1.61969200  | -1.46224100 |   |             |             |             |
| H | -1.45405100 | -0.84904500 | -0.95620300 |   |             |             |             |
| H | -1.59513600 | -3.43559600 | -0.12329000 |   |             |             |             |
| H | 0.48389400  | -1.80858400 | 1.21116400  |   |             |             |             |
| H | 0.44081200  | 0.81251200  | 0.80024900  |   |             |             |             |
| H | -1.31360500 | 0.80521100  | 0.92923300  |   |             |             |             |
| H | -1.26220800 | -1.66478000 | 1.43482000  |   |             |             |             |
| H | -0.88667000 | 5.44596700  | 0.71269200  |   |             |             |             |
| H | 0.30603300  | 1.73081300  | -1.49823000 |   |             |             |             |
| H | 0.30045800  | -0.87152900 | -1.07627900 |   |             |             |             |
| H | 0.29036300  | -6.15855500 | 0.02530800  |   |             |             |             |
| H | 0.51513400  | 6.04471500  | -0.20633000 |   |             |             |             |
| H | 0.75188100  | 5.36964900  | 1.40388500  |   |             |             |             |
| H | -1.08023600 | -5.46089200 | -0.87010400 |   |             |             |             |
| C | -5.80685000 | 1.99925000  | -0.27336000 |   |             |             |             |
| C | -5.76615800 | 0.69133800  | 0.52727000  |   |             |             |             |
| C | -5.80480500 | -0.54287100 | -0.38049800 |   |             |             |             |
| C | -5.78110400 | -1.85107400 | 0.42016200  |   |             |             |             |
| N | -5.78659800 | -3.04277300 | -0.42352800 |   |             |             |             |
| N | -5.72356300 | 3.19215700  | 0.56476600  |   |             |             |             |
| C | -4.66634300 | -3.72829700 | -0.75968600 |   |             |             |             |
| C | -4.56454600 | 3.85016100  | 0.81274600  |   |             |             |             |
| O | -3.54891600 | -3.39911100 | -0.35795300 |   |             |             |             |
| O | -3.48943100 | 3.48931500  | 0.33054800  |   |             |             |             |
| C | -4.86202300 | -4.93404100 | -1.65455600 |   |             |             |             |
| C | -4.66140700 | 5.06630000  | 1.70928100  |   |             |             |             |
| H | -5.90439100 | -5.11245900 | -1.92302500 |   |             |             |             |
| H | -6.56522400 | 3.52585000  | 1.00869700  |   |             |             |             |
| H | -6.73024700 | 2.05947900  | -0.85640800 |   |             |             |             |

## 5-anti-t

Gibbs Free Energy= -1841.295834

|   |             |             |             |   |             |             |             |
|---|-------------|-------------|-------------|---|-------------|-------------|-------------|
| C | 5.56377400  | -0.22328400 | -0.96232100 | O | -1.24917100 | -5.15231400 | 0.18937600  |
| C | 5.01153100  | 0.81853700  | 0.02023000  | C | -7.03854800 | 3.31317400  | 0.80800700  |
| C | 4.75054000  | 2.17376600  | -0.64505600 | C | -1.79340900 | -6.85348300 | 1.79276700  |
| C | 4.21108500  | 3.22607200  | 0.32970600  | H | -2.67130800 | -7.33533300 | 2.22589700  |
| C | 3.92435000  | 4.56726400  | -0.35567100 | H | -1.20068100 | -6.40806100 | 2.59463400  |
| N | 3.42465600  | 5.58946000  | 0.56231700  | H | -3.20931900 | -4.40618700 | -1.14031000 |
| N | 5.78942100  | -1.52674500 | -0.35358100 | H | -4.11639500 | -6.08222000 | 1.10266800  |
| C | 2.11030200  | 5.81744400  | 0.78779600  | H | -4.86428500 | -4.92761300 | -0.82062600 |
| C | 6.96942100  | -1.87026800 | 0.21452300  | H | -4.96301600 | -3.35134100 | 1.14317500  |
| O | 1.22160000  | 5.19559600  | 0.20008300  | H | -5.71870200 | -2.51158300 | -1.09237100 |
| O | 7.94465800  | -1.11777800 | 0.25296200  | H | -4.07795300 | -2.01347000 | -1.46954500 |
| C | 1.77987800  | 6.89496200  | 1.79976800  | H | -4.90665800 | 0.38578000  | -1.79400900 |
| C | 7.02938400  | -3.26719700 | 0.80693800  | H | -6.55470200 | -0.08940900 | -1.36477300 |
| H | 6.09598000  | -3.81991000 | 0.69237000  | H | -5.75918500 | -0.90774500 | 0.84609200  |
| H | 7.27712600  | -3.18859600 | 1.86797500  | H | -5.02940900 | 2.20541600  | -0.32930500 |
| H | 6.51315900  | 0.12453200  | -1.37534300 | H | -7.84355300 | 3.87143100  | 0.32486500  |
| H | 5.01453100  | -2.18461500 | -0.33579000 | H | -6.10150400 | 3.85962900  | 0.69238100  |
| H | 4.86556600  | -0.36116300 | -1.79312800 | H | -4.11675600 | -0.40683400 | 0.45979800  |
| H | 4.08264100  | 0.43715800  | 0.46010400  | H | -3.31962600 | -2.83121800 | 0.79339300  |
| H | 4.03764500  | 2.04386700  | -1.46966300 | H | -7.28426400 | 3.23629300  | 1.86963300  |
| H | 5.68012300  | 2.54049900  | -1.09852900 | H | -1.17561000 | -7.61106000 | 1.30618500  |
| H | 4.83213100  | 4.95620900  | -0.82529000 |   |             |             |             |
| H | 3.17417600  | 4.44009500  | -1.13753700 |   |             |             |             |
| H | 3.28806800  | 2.86441900  | 0.79542300  |   |             |             |             |
| H | 4.09675100  | 6.11398600  | 1.10067300  |   |             |             |             |
| H | 1.16469800  | 7.165548700 | 1.31446700  |   |             |             |             |
| H | 2.66144300  | 7.37230800  | 2.23044700  |   |             |             |             |
| H | 4.93360900  | 3.381115500 | 1.13967000  |   |             |             |             |
| H | 5.72580000  | 0.93892800  | 0.84131300  |   |             |             |             |
| H | 1.18673900  | 6.45294900  | 2.60319300  |   |             |             |             |
| H | 7.83781400  | -3.81862900 | 0.32160200  |   |             |             |             |
| C | 0.80893000  | -2.46212800 | -1.31849200 |   |             |             |             |
| C | 0.42017600  | -1.24837800 | -0.46422800 |   |             |             |             |
| C | 0.03802900  | -0.03087700 | -1.31273600 |   |             |             |             |
| C | -0.35242200 | 1.18867200  | -0.47096700 |   |             |             |             |
| C | -0.73909800 | 2.39826600  | -1.33204000 |   |             |             |             |
| N | -1.10982900 | 3.56968300  | -0.54587900 |   |             |             |             |
| N | 1.15939800  | -3.63505000 | -0.52536400 |   |             |             |             |
| C | -2.37872000 | 3.82815600  | -0.17366400 |   |             |             |             |
| C | 2.42254800  | -3.91332800 | -0.14841900 |   |             |             |             |
| O | -3.33001700 | 3.09908800  | -0.48323000 |   |             |             |             |
| O | 3.38849200  | -3.20429500 | -0.45902200 |   |             |             |             |
| C | -2.58933000 | 5.08409100  | 0.64800000  |   |             |             |             |
| C | 2.60982000  | -5.16813900 | 0.68075000  |   |             |             |             |
| H | 1.67635100  | -5.70224400 | 0.86103700  |   |             |             |             |
| H | 3.06075800  | -4.89521000 | 1.63762900  |   |             |             |             |
| H | 1.66533700  | -2.21745200 | -1.94962700 |   |             |             |             |
| H | 0.40386300  | -4.24184600 | -0.21835500 |   |             |             |             |
| H | -0.02128700 | -2.74153600 | -1.97320000 |   |             |             |             |
| H | -0.41795000 | -1.52302700 | 0.18651700  |   |             |             |             |
| H | -0.79589500 | -0.29591200 | -1.97536400 |   |             |             |             |
| H | 0.87745900  | 0.23229500  | -1.96918800 |   |             |             |             |
| H | 0.09697400  | 2.68365000  | -1.97664500 |   |             |             |             |
| H | -1.58508100 | 2.14482800  | -1.97378300 |   |             |             |             |
| H | -1.19629900 | 0.93603200  | 0.17979200  |   |             |             |             |
| H | -0.36725900 | 4.19308200  | -0.24122300 |   |             |             |             |
| H | -3.29692200 | 5.73086200  | 0.12443400  |   |             |             |             |
| H | -1.66458800 | 5.63295100  | 0.82861900  |   |             |             |             |
| H | 0.48017000  | 1.46759200  | 0.18512400  |   |             |             |             |
| H | 1.25986900  | -0.99587100 | 0.19212000  |   |             |             |             |
| H | -3.03974700 | 4.80920100  | 1.60458200  |   |             |             |             |
| H | 3.30950300  | -5.82841600 | 0.16352600  |   |             |             |             |
| C | -3.95570800 | -4.53548200 | -0.35521200 |   |             |             |             |
| C | -4.24342900 | -3.19484900 | 0.33085300  |   |             |             |             |
| C | -4.78784000 | -2.14369000 | -0.64243600 |   |             |             |             |
| C | -5.04703700 | -0.78812600 | 0.02296700  |   |             |             |             |
| C | -5.60065200 | 0.25367600  | -0.95880000 |   |             |             |             |
| N | -5.81493000 | 1.56000700  | -0.35178400 |   |             |             |             |
| N | -3.44854000 | -5.55567400 | 0.56102300  |   |             |             |             |
| C | -6.99163700 | 1.91588700  | 0.21483100  |   |             |             |             |
| C | -2.13235300 | -5.77811200 | 0.78130200  |   |             |             |             |
| O | -7.97544600 | 1.17449700  | 0.25192700  |   |             |             |             |

## 5-para-t

Gibbs Free Energy= -1841.29497

|   |             |             |             |   |            |             |             |
|---|-------------|-------------|-------------|---|------------|-------------|-------------|
| C | -5.90724100 | -2.40155800 | -0.58290000 | O | 6.47079900 | -4.50910700 | 0.67871800  |
| C | -5.81192600 | -1.15752300 | 0.30944200  | C | 4.59821300 | -5.89687100 | 1.24883500  |
| C | -5.85465900 | 0.14309100  | -0.50041100 | C | 4.87606400 | 5.69432100  | 1.15132200  |
| C | -5.72364200 | 1.39812000  | 0.36976000  | H | 5.40895100 | 6.56505600  | 0.76255900  |
| C | -5.75204900 | 2.68705200  | -0.46108800 | H | 3.63476900 | 3.94205500  | -0.21656500 |
| N | -5.84018500 | -3.65556300 | 0.16373400  | H | 4.53527500 | 2.40169900  | -1.80808100 |
| N | -5.60185700 | 3.89655600  | 0.34400200  | H | 6.08748300 | 2.46324200  | -0.96479700 |
| C | -4.41695000 | 4.52557000  | 0.53431400  | H | 3.54216100 | 1.19878800  | 0.17631600  |
| C | -4.68854500 | -4.33747600 | 0.37401300  | H | 4.48594900 | -0.12054800 | -1.74967700 |
| O | -3.37078700 | 4.12572200  | 0.01933400  | H | 6.05199900 | -0.15071500 | -0.95679200 |
| O | -3.60655500 | -3.95173000 | -0.07336700 | H | 3.48333900 | -1.35012100 | 0.21263300  |
| C | -4.80113100 | -5.61161600 | 1.18443200  | H | 4.38501000 | -2.63920500 | -1.75905600 |
| C | -4.44586200 | 5.76085100  | 1.40977100  | H | 5.94361100 | -2.76790500 | -0.93569100 |
| H | -4.08535200 | 6.61155900  | 0.82758000  | H | 3.42607900 | -4.08932900 | -0.10653100 |
| H | -6.41581700 | 4.26219400  | 0.81350500  | H | 5.07165500 | -1.42220000 | 0.96564300  |
| H | -6.69339300 | 2.76392600  | -1.01285100 | H | 5.12459500 | 1.19846400  | 0.94522400  |
| H | -4.93905900 | 2.68369300  | -1.18819500 | H | 5.05866100 | -6.80703300 | 0.85773900  |
| H | -6.53431300 | 1.42427000  | 1.10776400  | H | 3.52073100 | -5.93722000 | 1.08337500  |
| H | -6.79213000 | 0.18872300  | -1.06959200 | H | 3.81013900 | 5.80259800  | 0.94636700  |
| H | -5.04600000 | 0.13301400  | -1.24147300 | H | 5.03762000 | 5.66615300  | 2.23135900  |
| H | -6.63259500 | -1.16885600 | 1.03663800  | H | 4.79983500 | -5.86219100 | 2.32190100  |
| H | -6.84469200 | -2.39631200 | -1.14627700 |   |            |             |             |
| H | -5.08690000 | -2.41128300 | -1.30195400 |   |            |             |             |
| H | -6.68706400 | -4.01177300 | 0.57905200  |   |            |             |             |
| H | -4.88034000 | -1.20718800 | 0.88251000  |   |            |             |             |
| H | -4.78488700 | 1.36335200  | 0.93238900  |   |            |             |             |
| H | -4.42360300 | -6.44280000 | 0.58534500  |   |            |             |             |
| H | -5.82051300 | -5.83636700 | 1.50164800  |   |            |             |             |
| H | -5.43728200 | 5.99381800  | 1.80106700  |   |            |             |             |
| H | -3.75787600 | 5.61632600  | 2.24531400  |   |            |             |             |
| H | -4.16505700 | -5.52465400 | 2.06782700  |   |            |             |             |
| C | -0.50075000 | -2.53887800 | -1.33625500 |   |            |             |             |
| C | -0.52677700 | -1.25668200 | -0.49463800 |   |            |             |             |
| C | -0.39420800 | 0.01166700  | -1.34388300 |   |            |             |             |
| C | -0.45532300 | 1.29615900  | -0.51079600 |   |            |             |             |
| C | -0.38510500 | 2.56392600  | -1.37149000 |   |            |             |             |
| N | -0.70882800 | -3.74464500 | -0.54243200 |   |            |             |             |
| N | -0.50908700 | 3.78925200  | -0.59031600 |   |            |             |             |
| C | 0.55229300  | 4.51476200  | -0.18403800 |   |            |             |             |
| C | 0.30274700  | -4.50372900 | -0.07527700 |   |            |             |             |
| O | 1.71935600  | 4.21651400  | -0.46383100 |   |            |             |             |
| O | 1.49245900  | -4.25575200 | -0.30358000 |   |            |             |             |
| C | -0.09820900 | -5.71140800 | 0.74952900  |   |            |             |             |
| C | 0.23807800  | 5.74871100  | 0.63920100  |   |            |             |             |
| H | 0.63192100  | 6.62610500  | 0.12125400  |   |            |             |             |
| H | -1.44322400 | 4.06563100  | -0.30032900 |   |            |             |             |
| H | -1.19000900 | 2.55703600  | -2.11263000 |   |            |             |             |
| H | 0.56435600  | 2.60694600  | -1.90711400 |   |            |             |             |
| H | -1.38507200 | 1.31336100  | 0.06968600  |   |            |             |             |
| H | -1.19493100 | 0.02890400  | -2.09518300 |   |            |             |             |
| H | 0.54912700  | -0.01774500 | -1.90323000 |   |            |             |             |
| H | -1.46576800 | -1.22333900 | 0.07010600  |   |            |             |             |
| H | -1.28576600 | -2.50219000 | -2.09743000 |   |            |             |             |
| H | 0.45824500  | -2.63751400 | -1.84723700 |   |            |             |             |
| H | -1.66592700 | -3.97962300 | -0.29366700 |   |            |             |             |
| H | 0.28276600  | -1.29985200 | 0.24181500  |   |            |             |             |
| H | 0.36770500  | 1.31198600  | 0.21171700  |   |            |             |             |
| H | 0.26619300  | -6.61319000 | 0.25206900  |   |            |             |             |
| H | -1.17648000 | -5.79251700 | 0.89227900  |   |            |             |             |
| H | -0.82984100 | 5.88470200  | 0.81412600  |   |            |             |             |
| H | 0.75386200  | 5.67357800  | 1.59903800  |   |            |             |             |
| H | 0.39138200  | -5.65173300 | 1.72389900  |   |            |             |             |
| C | 4.86837000  | -2.67277500 | -0.77682000 |   |            |             |             |
| C | 4.55831600  | -1.38555500 | -0.00130300 |   |            |             |             |
| C | 4.97215100  | -0.12281400 | -0.76483100 |   |            |             |             |
| C | 4.61957200  | 1.17298600  | -0.02635400 |   |            |             |             |
| C | 5.00653700  | 2.42809200  | -0.81992400 |   |            |             |             |
| N | 4.41967800  | -3.87727500 | -0.09091000 |   |            |             |             |
| N | 4.61189700  | 3.66783900  | -0.16405500 |   |            |             |             |
| C | 5.47610400  | 4.44181700  | 0.53480800  |   |            |             |             |
| C | 5.25653500  | -4.69640000 | 0.58968100  |   |            |             |             |
| O | 6.67141700  | 4.17686000  | 0.67070900  |   |            |             |             |



## 6-anti-t

Gibbs Free Energy= -1959.188800

|   |             |             |             |   |             |             |             |
|---|-------------|-------------|-------------|---|-------------|-------------|-------------|
| H | -0.28245000 | -5.46353800 | -1.43784500 | H | 4.98292000  | 3.14116100  | 1.02235200  |
| C | -0.79881400 | -6.19242300 | -0.81141500 | H | 3.82812100  | 1.91015600  | 0.52554800  |
| H | -1.42141000 | -6.81039600 | -1.46434900 | C | 3.55690200  | 3.81894200  | -0.45911200 |
| C | -1.66388600 | -5.47602300 | 0.23224700  | H | 3.03223000  | 3.40811200  | -1.33150200 |
| H | -1.00724900 | -4.91057300 | 0.90227700  | H | 4.18457400  | 4.63595500  | -0.83654600 |
| H | -2.17861800 | -6.22152600 | 0.85029800  | C | 2.52857300  | 4.38736900  | 0.52541700  |
| C | -2.69075800 | -4.53383000 | -0.40546800 | H | 3.05455100  | 4.81834400  | 1.38658600  |
| H | -3.33697800 | -5.10077000 | -1.08734900 | H | 1.91541600  | 3.56749800  | 0.92051100  |
| H | -2.16605400 | -3.79549700 | -1.02492500 | C | 1.61429200  | 5.44775900  | -0.09844900 |
| C | -3.56141900 | -3.80162200 | 0.62215700  | H | 1.06754500  | 5.01771800  | -0.94476800 |
| H | -2.91170200 | -3.26644200 | 1.32697600  | H | 2.22206800  | 6.26745100  | -0.50044400 |
| H | -4.11631900 | -4.53803900 | 1.21692900  | C | 0.60335600  | 6.01409700  | 0.90533100  |
| C | -4.54432400 | -2.81239200 | -0.01296400 | H | 1.12406900  | 6.47306400  | 1.75092900  |
| H | -5.20770600 | -3.33805100 | -0.70805700 | H | -0.02878200 | 5.21724400  | 1.29882500  |
| H | -3.99217400 | -2.07057700 | -0.60165800 | N | -0.28491500 | 7.01760800  | 0.32267700  |
| C | -5.40276500 | -2.08199800 | 1.02863000  | H | 0.08097700  | 7.94598400  | 0.17703500  |
| H | -4.75836900 | -1.57064000 | 1.75036300  | N | 6.31204600  | 1.12800700  | -0.27525000 |
| H | -6.01542900 | -2.80100000 | 1.57617900  | H | 5.95371100  | 0.17722200  | -0.28424000 |
| N | -6.29434400 | -1.08857900 | 0.44623300  | C | 7.50868800  | 1.37909400  | 0.30727700  |
| H | -5.91962900 | -0.16144800 | 0.26662600  | C | -1.54147700 | 6.75686100  | -0.10819900 |
| N | 0.22425700  | -7.05384100 | -0.22076000 | O | -2.06153500 | 5.64334900  | -0.00852800 |
| H | -0.04484500 | -7.97913700 | 0.07603600  | O | 7.99611000  | 2.50789000  | 0.39038800  |
| C | 1.49246500  | -6.64862600 | 0.02263000  | C | -2.29384900 | 7.92136000  | -0.71841700 |
| C | -7.57198700 | -1.36813300 | 0.09563100  | H | -1.71556600 | 8.84622700  | -0.74550600 |
| O | -8.09033500 | -2.47463100 | 0.25594500  | H | -3.20705200 | 8.08922200  | -0.14363300 |
| O | 1.89125700  | -5.51899600 | -0.27135100 | H | -2.58819100 | 7.65502300  | -1.73564900 |
| C | -8.35100600 | -0.21407500 | -0.51097400 | C | 8.23648400  | 0.16452000  | 0.85617600  |
| H | -7.76462600 | 0.70230300  | -0.59072400 | H | 9.21234400  | 0.09246100  | 0.37052600  |
| H | -9.23447600 | -0.02644200 | 0.10363000  | H | 7.68706400  | -0.76562500 | 0.70544500  |
| H | -8.69898400 | -0.50881200 | -1.50364600 | H | 8.41219800  | 0.31384700  | 1.92406800  |
| C | 2.41062000  | -7.66451100 | 0.66998400  |   |             |             |             |
| H | 3.26747400  | -7.83098400 | 0.01379100  |   |             |             |             |
| H | 1.92719800  | -8.62132700 | 0.87264300  |   |             |             |             |
| H | 2.78745300  | -7.25068100 | 1.60768900  |   |             |             |             |
| H | 2.98733700  | -1.23036400 | -1.65719200 |   |             |             |             |
| C | 2.39693100  | -1.98808300 | -1.13888800 |   |             |             |             |
| H | 1.77705200  | -2.49688200 | -1.88266000 |   |             |             |             |
| C | 1.50812800  | -1.33076400 | -0.07535100 |   |             |             |             |
| H | 2.14844400  | -0.82486400 | 0.65548700  |   |             |             |             |
| H | 0.96596800  | -2.11296100 | 0.46864000  |   |             |             |             |
| C | 0.51192500  | -0.33351800 | -0.67561300 |   |             |             |             |
| H | -0.11628700 | -0.84578900 | -1.41548100 |   |             |             |             |
| H | 1.05892500  | 0.44264400  | -1.22589600 |   |             |             |             |
| C | -0.38660900 | 0.32988400  | 0.37411700  |   |             |             |             |
| H | 0.24157200  | 0.84247800  | 1.11405700  |   |             |             |             |
| H | -0.93236500 | -0.44692400 | 0.92464700  |   |             |             |             |
| C | -1.38565600 | 1.32519500  | -0.22432500 |   |             |             |             |
| H | -2.02421500 | 0.81872500  | -0.95602500 |   |             |             |             |
| H | -0.84686700 | 2.11088200  | -0.76685400 |   |             |             |             |
| C | -2.27714000 | 1.97495300  | 0.84137700  |   |             |             |             |
| H | -1.65965000 | 2.48783700  | 1.58474300  |   |             |             |             |
| H | -2.85802400 | 1.21075300  | 1.36099400  |   |             |             |             |
| N | -3.21184800 | 2.94979300  | 0.29248200  |   |             |             |             |
| H | -2.87690000 | 3.89754500  | 0.14773600  |   |             |             |             |
| N | 3.32056400  | -2.97131000 | -0.58495000 |   |             |             |             |
| H | 2.96429000  | -3.90881800 | -0.41990800 |   |             |             |             |
| C | 4.58764800  | -2.67567400 | -0.23497300 |   |             |             |             |
| C | -4.47362000 | 2.63794700  | -0.06505300 |   |             |             |             |
| O | -4.94571500 | 1.50090500  | 0.05849100  |   |             |             |             |
| O | 5.08180100  | -1.54986900 | -0.37578100 |   |             |             |             |
| C | -5.30369900 | 3.77347600  | -0.62957100 |   |             |             |             |
| H | -4.75771800 | 4.71637700  | -0.67420000 |   |             |             |             |
| H | -6.19399500 | 3.89924300  | -0.00921000 |   |             |             |             |
| H | -5.63788900 | 3.50025000  | -1.63305900 |   |             |             |             |
| C | 5.40102200  | -3.81682100 | 0.34347200  |   |             |             |             |
| H | 6.29284400  | -3.95915300 | -0.27081600 |   |             |             |             |
| H | 4.84480200  | -4.75352800 | 0.39394800  |   |             |             |             |
| H | 5.73287200  | -3.54042800 | 1.34691700  |   |             |             |             |
| H | 6.13429600  | 2.98294700  | -1.17799900 |   |             |             |             |
| C | 5.47689900  | 2.18016700  | -0.83802400 |   |             |             |             |
| H | 4.96597400  | 1.77006300  | -1.71452500 |   |             |             |             |
| C | 4.44861900  | 2.73546200  | 0.15666700  |   |             |             |             |

## 6-para-t

Gibbs Free Energy= -1959.188062

|   |             |             |             |   |             |             |             |
|---|-------------|-------------|-------------|---|-------------|-------------|-------------|
| C | 2.52429600  | 1.83030400  | 1.13301600  | H | -3.60999500 | 5.37089300  | -1.36948500 |
| C | 1.54223800  | 1.21544700  | 0.12738200  | H | -1.28263700 | 6.47807700  | -1.57726900 |
| C | 0.31105800  | 0.60244500  | 0.80225900  | H | 3.74428200  | 5.96478800  | -2.71410300 |
| C | -0.69175800 | 0.01090500  | -0.19570300 | C | -5.46520900 | 3.53726100  | -0.43471400 |
| C | -1.95999600 | -0.53701200 | 0.46628100  | H | -5.91147500 | 4.22348200  | -1.16064200 |
| N | 3.65136400  | 2.49885700  | 0.49286600  | H | -5.08522100 | 2.67450400  | -0.98300500 |
| C | 4.85721700  | 1.91957900  | 0.32453400  | N | -1.82521500 | -5.72076200 | -1.06196300 |
| O | 5.11716700  | 0.77670300  | 0.71871400  | C | -2.14612000 | -7.03019800 | -1.19688000 |
| C | 5.90606700  | 2.75978500  | -0.37743400 | C | -3.53428400 | -7.41293100 | -0.71326100 |
| H | 5.53969900  | 3.74506000  | -0.66831700 | H | -2.50009100 | -5.08821000 | -0.64270000 |
| H | 6.76456500  | 2.87733700  | 0.28757300  | H | -4.08854600 | -6.57048100 | -0.29740400 |
| H | 2.00831500  | 2.56825500  | 1.75474200  | H | -3.43767000 | -8.19376000 | 0.04450900  |
| H | 3.48988600  | 3.43195900  | 0.12420600  | H | -4.09252000 | -7.83676500 | -1.55136200 |
| H | 2.92577900  | 1.05890300  | 1.79191100  | O | -1.38545300 | -7.86921400 | -1.68154900 |
| H | 2.06673400  | 0.45332600  | -0.45923500 | N | -4.21509400 | -1.52560400 | 0.04877000  |
| H | 0.62716400  | -0.17773400 | 1.50572100  | C | -4.49892300 | -2.81437200 | 0.32705600  |
| H | -0.19191000 | 1.37031100  | 1.40458300  | O | -3.72506300 | -3.74762800 | 0.08413000  |
| H | -2.44632100 | 0.25805200  | 1.04358900  | C | -5.85054000 | -3.07420400 | 0.96297400  |
| H | -1.70195400 | -1.32937600 | 1.17727700  | N | -6.52726600 | 3.05067500  | 0.44201900  |
| H | -0.20338800 | -0.78607400 | -0.77006100 | C | -6.62646300 | 1.76514000  | 0.85872800  |
| H | -0.97061600 | 0.78353300  | -0.92425700 | O | -5.83037400 | 0.89368300  | 0.50324000  |
| H | 1.22515300  | 1.99263700  | -0.57797800 | C | -7.78315700 | 1.44843200  | 1.78379000  |
| H | 6.24865200  | 2.22526200  | -1.26624900 | H | -5.69740300 | -3.57894600 | 1.91938100  |
| C | -2.96158000 | -1.09101800 | -0.55552400 | H | -4.88925800 | -0.80478300 | 0.28940200  |
| H | -3.19699400 | -0.32303300 | -1.29880600 | H | -6.43013400 | -2.16421800 | 1.12339800  |
| H | -2.53320100 | -1.94498100 | -1.08228000 | H | -7.38767800 | 1.02534300  | 2.70942000  |
| C | 4.82725700  | -2.89381000 | 1.28785200  | H | -8.39905700 | 2.31676400  | 2.02311500  |
| C | 3.91526600  | -3.19218100 | 0.09023800  | H | -7.19663900 | 3.71698700  | 0.79491300  |
| C | 2.66630800  | -3.98696600 | 0.48465100  | H | -8.41008300 | 0.68756000  | 1.31397600  |
| C | 1.71810100  | -4.25476200 | -0.69037500 | H | -6.41583000 | -3.75272400 | 0.32012200  |
| C | 0.41865100  | -4.95291000 | -0.27690500 |   |             |             |             |
| N | 5.96050000  | -2.04407000 | 0.94784000  |   |             |             |             |
| C | 7.20983700  | -2.52395800 | 0.74108200  |   |             |             |             |
| O | 7.50460200  | -3.71662900 | 0.83294000  |   |             |             |             |
| C | 8.25819700  | -1.48201700 | 0.38904800  |   |             |             |             |
| H | 7.85494900  | -0.46958200 | 0.33792600  |   |             |             |             |
| H | 9.05178600  | -1.51711400 | 1.13903800  |   |             |             |             |
| H | 4.25260400  | -2.39376700 | 2.07458000  |   |             |             |             |
| H | 5.78660700  | -1.04911300 | 0.83821400  |   |             |             |             |
| H | 5.22362700  | -3.82271900 | 1.70111100  |   |             |             |             |
| H | 4.48916600  | -3.74149500 | -0.66415000 |   |             |             |             |
| H | 2.96504000  | -4.94163300 | 0.93513900  |   |             |             |             |
| H | 2.12247100  | -3.43858100 | 1.26533700  |   |             |             |             |
| H | -0.09230300 | -4.35293900 | 0.48576600  |   |             |             |             |
| H | 0.64123200  | -5.92183800 | 0.18329000  |   |             |             |             |
| H | 2.23642300  | -4.85883800 | -1.44541200 |   |             |             |             |
| H | 1.47431000  | -3.30124300 | -1.17782900 |   |             |             |             |
| H | 3.61526200  | -2.24361600 | -0.37110700 |   |             |             |             |
| H | 8.70425600  | -1.74430600 | -0.57297300 |   |             |             |             |
| C | -0.53590200 | -5.17172000 | -1.45858200 |   |             |             |             |
| H | -0.71459700 | -4.21979300 | -1.97046200 |   |             |             |             |
| H | -0.09218400 | -5.85984000 | -2.17989200 |   |             |             |             |
| C | 0.22518600  | 6.51788100  | -0.03031900 |   |             |             |             |
| C | -0.90519200 | 5.81329600  | -0.79074800 |   |             |             |             |
| C | -2.05642000 | 5.39719000  | 0.13141200  |   |             |             |             |
| C | -3.20096100 | 4.69415900  | -0.60847400 |   |             |             |             |
| C | -4.32591300 | 4.23005600  | 0.32323000  |   |             |             |             |
| N | 1.34427100  | 6.90243900  | -0.88665600 |   |             |             |             |
| C | 2.48208700  | 6.17672000  | -1.00685100 |   |             |             |             |
| O | 2.66925100  | 5.13514400  | -0.37448600 |   |             |             |             |
| C | 3.52678000  | 6.72214000  | -1.95821700 |   |             |             |             |
| H | 3.22303800  | 7.64453200  | -2.45560300 |   |             |             |             |
| H | 4.44725500  | 6.90638300  | -1.40017000 |   |             |             |             |
| H | -0.15177100 | 7.42024100  | 0.46019800  |   |             |             |             |
| H | 1.24739000  | 7.73071300  | -1.45355200 |   |             |             |             |
| H | 0.62625100  | 5.86182900  | 0.74307800  |   |             |             |             |
| H | -0.49436000 | 4.93152000  | -1.29396500 |   |             |             |             |
| H | -1.66992900 | 4.73206700  | 0.91347700  |   |             |             |             |
| H | -2.44966300 | 6.28162800  | 0.64868800  |   |             |             |             |
| H | -4.72755000 | 5.08868000  | 0.87504000  |   |             |             |             |
| H | -3.92657100 | 3.53509800  | 1.06967000  |   |             |             |             |
| H | -2.80206100 | 3.82848800  | -1.15143700 |   |             |             |             |

## 7-anti-t

Gibbs Free Energy= -2077.083084

|   |             |             |             |   |             |             |             |
|---|-------------|-------------|-------------|---|-------------|-------------|-------------|
| C | -5.22786200 | -3.45334200 | -0.95913500 | H | 2.69746600  | -0.27524100 | 0.33339700  |
| C | -4.07792600 | -3.80030100 | -0.00378400 | H | 1.97974400  | -1.88026200 | 0.28545800  |
| C | -2.92401400 | -4.51929900 | -0.71042800 | C | -1.75736400 | 6.53065100  | -0.28409400 |
| C | -1.75814200 | -4.86203600 | 0.22403400  | C | -0.58464300 | 5.86919500  | 0.44948300  |
| C | -0.58687800 | -5.55030100 | -0.48658800 | C | 0.58579000  | 5.54796800  | -0.48613400 |
| N | -6.31378000 | -2.72443300 | -0.31782100 | C | 1.75715700  | 4.85969600  | 0.22431000  |
| C | -7.39413800 | -3.34127200 | 0.21592500  | C | 2.92317400  | 4.51763000  | -0.71021700 |
| O | -7.55466000 | -4.56305600 | 0.19641200  | N | -2.88740200 | 6.83873100  | 0.59098100  |
| C | -8.42613600 | -2.42285600 | 0.84735900  | C | -3.93029800 | 5.99931200  | 0.78911100  |
| H | -8.15532400 | -1.36806600 | 0.78332300  | O | -4.02261400 | 4.91477700  | 0.20871300  |
| H | -9.38594400 | -2.58076300 | 0.35018900  | C | -4.99463900 | 6.46738100  | 1.76008100  |
| H | -4.85460100 | -2.83771900 | -1.78310600 | H | -4.79808000 | 7.45587200  | 2.17807100  |
| H | -6.23266900 | -1.71358500 | -0.25045000 | H | -5.95702100 | 6.48373400  | 1.24458200  |
| H | -5.64464200 | -4.36797400 | -1.38589800 | H | -1.43519300 | 7.46404600  | -0.75411900 |
| H | -4.46952700 | -4.42690400 | 0.80465000  | H | -2.85706500 | 7.69367700  | 1.12468500  |
| H | -3.29910700 | -5.44020900 | -1.17467100 | H | -2.12913900 | 5.87336000  | -1.07137600 |
| H | -2.55423300 | -3.89186100 | -1.53210700 | H | -0.94270300 | 4.95024400  | 0.92599800  |
| H | -0.23169700 | -4.90772800 | -1.30225700 | H | 0.23057600  | 4.90550500  | -1.30187400 |
| H | -0.94251900 | -6.47494400 | -0.95899700 | H | 0.94135900  | 6.47269300  | -0.95843400 |
| H | -2.12116500 | -5.50677700 | 1.03410600  | H | 3.29794400  | 5.43882000  | -1.17416400 |
| H | -1.39748900 | -3.94322500 | 0.70386300  | H | 2.55364500  | 3.89031300  | -1.53210200 |
| H | -3.70952000 | -2.87756800 | 0.45993300  | H | 1.39671200  | 3.94062200  | 0.70379400  |
| H | -8.55018100 | -2.70214700 | 1.89617600  | H | 2.11997900  | 5.50423700  | 1.03463100  |
| C | 0.58362900  | -5.87162300 | 0.44890700  | H | -0.24311000 | 6.52993200  | 1.25532200  |
| C | 1.75649600  | -6.53252400 | -0.28493200 | H | -5.06872300 | 5.74544900  | 2.57628600  |
| N | 2.88712400  | -6.83975600 | 0.58972500  | C | 4.07734100  | 3.79886000  | -0.00376400 |
| C | 3.92764100  | -5.99790600 | 0.78996600  | C | 5.22754700  | 3.45288500  | -0.95914800 |
| O | 4.01660200  | -4.91156500 | 0.21242300  | N | 6.31379400  | 2.72429400  | -0.31803400 |
| C | 4.99352200  | -6.46544700 | 1.75948800  | C | 7.39389500  | 3.34147800  | 0.21584500  |
| H | 5.95553700  | -6.47949000 | 1.24320900  | O | 7.55361600  | 4.56337600  | 0.19708600  |
| H | 5.06701400  | -5.74449700 | 2.57659800  | C | 8.42656100  | 2.42331800  | 0.84655700  |
| H | 4.79900300  | -7.45485400 | 2.17625500  | H | 9.38625900  | 2.58237100  | 0.34954500  |
| H | 2.85914500  | -7.69618900 | 1.12115600  | H | 8.55036900  | 2.70183000  | 1.89561100  |
| H | 2.12741800  | -5.87517000 | -1.07258600 | H | 8.15654700  | 1.36837800  | 0.78161800  |
| H | 1.43481800  | -7.46627200 | -0.75456200 | H | 6.23362000  | 1.71330700  | -0.25172800 |
| H | 0.94149900  | -4.95273100 | 0.92564900  | H | 5.64387400  | 4.36792400  | -1.38548800 |
| H | 0.24230500  | -6.53270200 | 1.25454600  | H | 4.85468300  | 2.83740500  | -1.78340900 |
| C | -3.50424600 | 1.55089200  | -1.20190700 | H | 4.46857000  | 4.42529700  | 0.80497900  |
| C | -2.33159200 | 1.05785800  | -0.34467900 | H | 3.70933100  | 2.87575200  | 0.45952200  |
| C | -1.17256100 | 0.51761100  | -1.18836400 |   |             |             |             |
| C | 0.00106200  | 0.00146500  | -0.34827300 |   |             |             |             |
| C | 1.17468900  | -0.51512000 | -1.18809300 |   |             |             |             |
| N | -4.60087400 | 2.10212300  | -0.41341500 |   |             |             |             |
| C | -5.65393400 | 1.36624300  | -0.00753600 |   |             |             |             |
| O | -5.78431900 | 0.16758000  | -0.28619700 |   |             |             |             |
| C | -6.69956100 | 2.09579900  | 0.81268600  |   |             |             |             |
| H | -6.44466900 | 3.14037500  | 0.99467800  |   |             |             |             |
| H | -7.65589500 | 2.04599600  | 0.28690000  |   |             |             |             |
| H | -3.16539300 | 2.33219200  | -1.88822100 |   |             |             |             |
| H | -4.53478600 | 3.07597600  | -0.12932700 |   |             |             |             |
| H | -3.90289900 | 0.72913400  | -1.79963500 |   |             |             |             |
| H | -2.69519900 | 0.27791800  | 0.33327100  |   |             |             |             |
| H | -1.53792100 | -0.29166600 | -1.83353700 |   |             |             |             |
| H | -0.81524000 | 1.30669100  | -1.86289900 |   |             |             |             |
| H | 1.54029100  | 0.29388400  | -1.83347000 |   |             |             |             |
| H | 0.81727700  | -1.30433200 | -1.86242400 |   |             |             |             |
| H | -0.35286400 | -0.80067300 | 0.31179300  |   |             |             |             |
| H | 0.35496800  | 0.80391400  | 0.31143000  |   |             |             |             |
| H | -1.97827600 | 1.88327900  | 0.28438700  |   |             |             |             |
| H | -6.82151900 | 1.58124200  | 1.76837400  |   |             |             |             |
| C | 2.33347700  | -1.05540500 | -0.34410300 |   |             |             |             |
| C | 3.50590200  | -1.54958500 | -1.20098300 |   |             |             |             |
| N | 4.60192800  | -2.10130100 | -0.41200100 |   |             |             |             |
| C | 5.65634200  | -1.36654900 | -0.00760500 |   |             |             |             |
| O | 5.78887800  | -0.16862100 | -0.28839100 |   |             |             |             |
| C | 6.70090200  | -2.09654300 | 0.81360200  |   |             |             |             |
| H | 6.82473400  | -1.57998400 | 1.76795800  |   |             |             |             |
| H | 6.44377500  | -3.14010000 | 0.99828100  |   |             |             |             |
| H | 7.65697100  | -2.05019400 | 0.28700500  |   |             |             |             |
| H | 4.53424200  | -3.07458700 | -0.12632100 |   |             |             |             |
| H | 3.90533900  | -0.72837700 | -1.79893100 |   |             |             |             |
| H | 3.16657900  | -2.33090100 | -1.88705600 |   |             |             |             |

## 7-para-t

Gibbs Free Energy= -2077.083132

|   |             |             |             |   |             |             |             |
|---|-------------|-------------|-------------|---|-------------|-------------|-------------|
| C | -3.86343300 | 0.03904100  | 1.52491700  | H | 2.98482200  | 3.27002900  | -0.18551100 |
| C | -2.60577400 | -0.17961600 | 0.67466000  | H | 3.24833000  | 4.77933100  | -1.04985800 |
| C | -1.31991600 | -0.18170000 | 1.50766600  | C | -4.46946000 | -5.33089900 | 0.49923100  |
| C | -0.06041300 | -0.42642900 | 0.66918400  | C | -3.23924500 | -5.32675900 | -0.41640300 |
| C | 1.23256000  | -0.45963100 | 1.49171100  | C | -1.94361000 | -5.62296800 | 0.34697200  |
| N | -5.09544100 | -0.00802100 | 0.74500600  | C | -0.69667300 | -5.60213600 | -0.54494200 |
| C | -5.69427100 | 1.09365600  | 0.25062700  | C | 0.60123100  | -5.88994700 | 0.21887400  |
| O | -5.26602200 | 2.23775500  | 0.44525600  | N | -5.71815600 | -5.05300300 | -0.20689700 |
| C | -6.95142800 | 0.85821200  | -0.56383300 | C | -6.27156800 | -3.82014800 | -0.29557500 |
| H | -7.23095300 | -0.19439600 | -0.62115400 | O | -5.76701300 | -2.83190500 | -0.99208800 |
| H | -7.77095100 | 1.42526400  | -0.11711600 | C | -7.55981700 | -3.72010600 | -1.08613800 |
| H | -3.93094500 | -0.73022100 | 2.29990800  | H | -7.89365200 | -4.67471900 | -1.49590700 |
| H | -5.47167000 | -0.92426200 | 0.51595700  | H | -8.34078900 | -3.32105300 | -0.43554600 |
| H | -3.82058100 | 1.01070000  | 2.01966600  | H | -4.57247500 | -6.30156800 | 0.99294900  |
| H | -2.55509700 | 0.60558100  | -0.08748100 | H | -6.16781100 | -5.81134300 | -0.69593300 |
| H | -1.22476000 | 0.77537000  | 2.03570100  | H | -4.36400700 | -4.57220800 | 1.27588700  |
| H | -1.39187300 | -0.95335400 | 2.28554000  | H | -3.16818900 | -4.34964300 | -0.90590400 |
| H | 1.14874600  | -1.13478200 | 2.26483600  | H | -1.82244000 | -4.88847800 | 1.15292300  |
| H | 1.34853600  | 0.49190700  | 2.02556100  | H | -2.02370600 | -6.60253600 | 0.83575000  |
| H | 0.01967100  | 0.35249300  | -0.09934500 | H | 0.53317700  | -6.87969900 | 0.68852900  |
| H | -0.16705900 | -1.37613900 | 0.12894200  | H | 0.70484700  | -5.16889700 | 1.03923400  |
| H | -2.70026500 | -1.13248200 | 0.14063500  | H | -0.61884000 | -4.62269400 | -1.03298700 |
| H | -6.79549500 | 1.24415900  | -1.57394900 | H | -0.81434400 | -6.33700300 | -1.35131500 |
| C | 2.47948500  | -0.72241000 | 0.64126400  | H | -3.37737900 | -6.06909500 | -1.21186200 |
| C | 3.76471100  | -0.78634100 | 1.47566800  | H | -7.41714600 | -3.01214500 | -1.90532000 |
| N | 4.94849100  | -1.07378100 | 0.67335800  | C | 1.85136300  | -5.82862800 | -0.66582100 |
| C | 5.81824200  | -0.12445300 | 0.27322500  | C | 3.13660500  | -6.11786300 | 0.11922300  |
| O | 5.70496800  | 1.06887600  | 0.57891600  | N | 4.34412400  | -6.03520500 | -0.69934000 |
| C | 6.97696000  | -0.60341800 | -0.57980200 | C | 5.13334100  | -4.93613100 | -0.76269500 |
| H | 6.94662300  | -0.08428400 | -1.54051900 | O | 4.90346100  | -3.92072600 | -0.10210700 |
| H | 7.91238000  | -0.32979100 | -0.08684000 | C | 6.32994800  | -5.02293100 | -1.68712300 |
| H | 6.96321900  | -1.68015100 | -0.75226900 | H | 6.26112800  | -4.22332400 | -2.42766000 |
| H | 5.07745900  | -2.03009200 | 0.35304000  | H | 7.23751900  | -4.85620200 | -1.10319200 |
| H | 3.67652700  | -1.56564300 | 2.23909700  | H | 6.41174400  | -5.98008000 | -2.20430500 |
| H | 3.93499200  | 0.16354100  | 1.98424100  | H | 4.57521700  | -6.81980600 | -1.28903000 |
| H | 2.36228100  | -1.66713400 | 0.09729200  | H | 3.09589100  | -7.11775900 | 0.56118000  |
| H | 2.58785200  | 0.06367900  | -0.11429000 | H | 3.25218900  | -5.39961800 | 0.93173500  |
| C | -3.22994200 | 5.38862500  | 0.48342300  | H | 1.75860700  | -6.54844800 | -1.48819000 |
| C | -1.97785000 | 4.86174100  | -0.23021800 | H | 1.93472200  | -4.83692400 | -1.12314100 |
| C | -0.68453400 | 5.20379800  | 0.51703700  |   |             |             |             |
| C | 0.57401100  | 4.64745300  | -0.15900200 |   |             |             |             |
| C | 1.86649700  | 4.94062000  | 0.61157400  |   |             |             |             |
| N | -4.47248800 | 5.01611100  | -0.18049900 |   |             |             |             |
| C | -5.13147100 | 5.84332900  | -1.02585300 |   |             |             |             |
| O | -4.75073700 | 6.98342500  | -1.29660300 |   |             |             |             |
| C | -6.40480000 | 5.27805400  | -1.63219700 |   |             |             |             |
| H | -6.62674800 | 4.26558900  | -1.29249100 |   |             |             |             |
| H | -7.23737600 | 5.93666400  | -1.37455800 |   |             |             |             |
| H | -3.26519000 | 5.00041900  | 1.50637400  |   |             |             |             |
| H | -4.83376400 | 4.07926100  | -0.02135000 |   |             |             |             |
| H | -3.19909000 | 6.47817500  | 0.53890600  |   |             |             |             |
| H | -1.94656500 | 5.27928600  | -1.24256800 |   |             |             |             |
| H | -0.59462300 | 6.29334200  | 0.61123700  |   |             |             |             |
| H | -0.74438700 | 4.81275200  | 1.54154300  |   |             |             |             |
| H | 1.77441300  | 4.54245300  | 1.63093400  |   |             |             |             |
| H | 1.98816400  | 6.02591300  | 0.71802200  |   |             |             |             |
| H | 0.65385000  | 5.05977200  | -1.17265000 |   |             |             |             |
| H | 0.46678500  | 3.56133900  | -0.27931200 |   |             |             |             |
| H | -2.06279300 | 3.77383000  | -0.33911800 |   |             |             |             |
| H | -6.30764900 | 5.28279200  | -2.72039600 |   |             |             |             |
| C | 3.11623300  | 4.35045700  | -0.05028100 |   |             |             |             |
| C | 4.39117200  | 4.59782400  | 0.76647400  |   |             |             |             |
| N | 5.57832900  | 3.99643000  | 0.17311300  |   |             |             |             |
| C | 6.50177000  | 4.70877800  | -0.51529800 |   |             |             |             |
| O | 6.43052400  | 5.92590100  | -0.69242600 |   |             |             |             |
| C | 7.66675000  | 3.90451900  | -1.06715500 |   |             |             |             |
| H | 7.69513200  | 4.02809900  | -2.15232900 |   |             |             |             |
| H | 8.59617000  | 4.31521500  | -0.66607000 |   |             |             |             |
| H | 7.60635400  | 2.84295500  | -0.82378000 |   |             |             |             |
| H | 5.69791400  | 2.99089400  | 0.26344300  |   |             |             |             |
| H | 4.26976300  | 4.19028500  | 1.77574700  |   |             |             |             |
| H | 4.57808200  | 5.66899400  | 0.85790100  |   |             |             |             |

## 8-anti-t

Gibbs Free Energy= -2194.976702

|   |             |             |             |   |             |             |             |
|---|-------------|-------------|-------------|---|-------------|-------------|-------------|
| C | 4.73386500  | 4.56529600  | -0.97149800 | C | -7.86180200 | 0.63258200  | -0.62313500 |
| C | 3.56744200  | 4.58015700  | 0.02552300  | O | -6.43196900 | -1.16869000 | 0.05981000  |
| C | 2.25150800  | 5.03251900  | -0.61558300 | H | -7.97936100 | 0.25549000  | -1.64155200 |
| C | 1.06962800  | 5.04461900  | 0.36067100  | H | -7.86624600 | 1.72304200  | -0.63871000 |
| C | -0.25978100 | 5.43809000  | -0.29298900 | H | -5.85775800 | 1.94156800  | 0.26122700  |
| N | 5.98584500  | 4.09702800  | -0.39245000 | H | -4.15337900 | 1.29411500  | 1.74873300  |
| C | 6.90356000  | 4.93783800  | 0.14018800  | H | -4.52308000 | -0.40591500 | 1.44720500  |
| O | 6.76304500  | 6.16187000  | 0.16982500  | H | -8.71387100 | 0.27604600  | -0.03998000 |
| C | 8.14839000  | 4.27519900  | 0.70444300  | C | 4.05186700  | -5.72662900 | -0.71585600 |
| H | 8.14014300  | 3.18980400  | 0.59631300  | C | 2.85421400  | -5.68530100 | -2.04733100 |
| H | 9.02384900  | 4.68333000  | 0.19426200  | C | 1.53985600  | -5.37012000 | -0.48160600 |
| H | 4.49356600  | 3.91365400  | -1.81722800 | C | 0.32657500  | -5.32860000 | 0.45481200  |
| H | 6.15221700  | 3.09479300  | -0.36243100 | C | -0.98262400 | -4.97263200 | -0.25876100 |
| H | 4.90255200  | 5.57156600  | -1.36059300 | N | 5.31836800  | -6.00545900 | -0.04235600 |
| H | 3.82600400  | 5.24364900  | 0.85785400  | C | 6.20876000  | -5.04990000 | 0.31485800  |
| H | 2.37962000  | 6.03587200  | -1.04118300 | O | 6.03510400  | -3.85460600 | 0.06646500  |
| H | 2.01383600  | 4.37136900  | -1.45971600 | C | 7.45241000  | -5.52864000 | 1.03510200  |
| H | -0.47451300 | 4.74537100  | -1.11692600 | H | 7.46824400  | -6.60592800 | 1.20758400  |
| H | -0.16173700 | 6.43180200  | -0.74823400 | H | 8.32864800  | -5.24997900 | 0.44579100  |
| H | 1.28864500  | 5.73462500  | 1.18539500  | H | 3.90003100  | -6.49270100 | -1.48200800 |
| H | 0.96646200  | 4.05056600  | 0.81467800  | H | 5.51561600  | -6.95871200 | 0.22072700  |
| H | 3.44622800  | 3.57534900  | 0.44735800  | H | 4.16487600  | -4.76823600 | -1.22394500 |
| H | 8.23525100  | 4.53336600  | 1.76237900  | H | 3.04521500  | -4.93144000 | 1.01227700  |
| C | -1.44323700 | 5.44181300  | 0.68158500  | H | 1.63331700  | -4.40454000 | -0.99486300 |
| C | -2.78072800 | 5.77158100  | 0.01012700  | H | 1.36568400  | -6.11707500 | -1.26666500 |
| H | -2.98827400 | 5.04276300  | -0.78088900 | H | -1.17110800 | -5.70160100 | -1.05699000 |
| H | -2.71935600 | 6.75355800  | -0.47472100 | H | -0.86937500 | -4.00007100 | -0.75499600 |
| H | -1.51625600 | 4.45913600  | 1.16482200  | H | 0.51242300  | -4.59951700 | 1.25396700  |
| H | -1.24875600 | 6.16332800  | 1.48542600  | H | 0.21755800  | -6.30193900 | 0.94978100  |
| C | -3.95038900 | 5.76750700  | 1.00148400  | H | 2.76988000  | -6.64935500 | 0.75701600  |
| N | -5.24062700 | 6.04107300  | 0.37181900  | H | 7.52217900  | -5.01280700 | 1.99489600  |
| C | -6.10971800 | 5.07591700  | -0.01008800 | C | -2.19668700 | -4.92332100 | 0.67619600  |
| C | -7.38332100 | 5.54770900  | -0.68090300 | C | -3.49644400 | -4.53238800 | -0.03492400 |
| O | -5.89196000 | 3.87699800  | 0.18046600  | H | -3.71333900 | -5.24791900 | -0.83524600 |
| H | -7.45718200 | 5.07786300  | -1.66380900 | H | -3.37727800 | -3.55173200 | -0.51099100 |
| H | -7.43698800 | 6.63098300  | -0.79974300 | H | -2.32456800 | -5.90257700 | 1.15465700  |
| H | -5.47198300 | 6.99913200  | 0.15887900  | H | -1.99778900 | -4.21095000 | 1.48801400  |
| H | -3.79037800 | 6.51602600  | 1.78303700  | C | -4.69862600 | -4.48287300 | 0.91786100  |
| H | -4.03184400 | 4.79391100  | 1.48630700  | N | -5.93862300 | -4.08261800 | 0.26678100  |
| H | -8.23759900 | 5.21236000  | -0.08892900 | C | -6.81432900 | -4.97758300 | -0.24996600 |
| C | 4.24174800  | -0.73289000 | -1.16038800 | C | -8.05363300 | -4.38143700 | -0.89413800 |
| C | 3.10443700  | -0.62345800 | -0.13665700 | O | -6.64004700 | -6.19667200 | -0.20356100 |
| C | 1.74948200  | -0.33405900 | -0.79033300 | H | -8.10464100 | -4.71560400 | -1.93296600 |
| C | 0.59754700  | -0.24443700 | 0.21692100  | H | -8.06672600 | -3.29134400 | -0.86121900 |
| C | -0.75624600 | 0.07461100  | -0.42659700 | H | -6.13503100 | -3.09007000 | 0.17681800  |
| N | 5.53764800  | -1.00939800 | -0.55146700 | H | -4.50371900 | -3.77473000 | 1.72935800  |
| C | 6.41382300  | -0.03909800 | -0.22138100 | H | -4.85815500 | -5.46665900 | 1.36412900  |
| O | 6.19849200  | 1.16075800  | -0.43441800 | H | -8.93603500 | -4.77077000 | -0.38089200 |
| C | 7.70465700  | -0.50077100 | 0.42492700  |   |             |             |             |
| H | 7.74882900  | -1.58189900 | 0.56007600  |   |             |             |             |
| H | 8.54338900  | -0.17954900 | -0.19702600 |   |             |             |             |
| H | 4.02956100  | -1.53481600 | -1.87394200 |   |             |             |             |
| H | 5.76177900  | -1.97387400 | -0.32432500 |   |             |             |             |
| H | 4.33087800  | 0.19866000  | -1.72203800 |   |             |             |             |
| H | 3.35006500  | 0.17054400  | 0.57693400  |   |             |             |             |
| H | 1.81226000  | 0.60582600  | -1.35341100 |   |             |             |             |
| H | 1.52443100  | -1.11581000 | -1.52779400 |   |             |             |             |
| H | -0.98668300 | -0.68478000 | -1.18474700 |   |             |             |             |
| H | -0.68468600 | 1.02874900  | -0.96430100 |   |             |             |             |
| H | 0.83172800  | 0.52319300  | 0.96559500  |   |             |             |             |
| H | 0.52365700  | -1.19158600 | 0.76662600  |   |             |             |             |
| H | 3.04823800  | -1.55587200 | 0.43756900  |   |             |             |             |
| H | 7.80736500  | -0.00968700 | 1.39532600  |   |             |             |             |
| C | -1.90878400 | 0.14773500  | 0.58122900  |   |             |             |             |
| C | -3.25520300 | 0.50158300  | -0.05808400 |   |             |             |             |
| H | -3.51234700 | -0.23866100 | -0.82365100 |   |             |             |             |
| H | -3.17929500 | 1.46898400  | -0.56812200 |   |             |             |             |
| H | -1.99457200 | -0.81424100 | 1.10265200  |   |             |             |             |
| H | -1.66683300 | 0.89066000  | 1.35267900  |   |             |             |             |
| C | -4.39349400 | 0.56624500  | 0.96808700  |   |             |             |             |
| N | -5.67357800 | 0.94997800  | 0.38474400  |   |             |             |             |
| C | -6.59106400 | 0.05487000  | -0.03182100 |   |             |             |             |

## 8-para-t

Gibbs Free Energy= -2194.977035

|   |             |             |             |   |             |             |             |
|---|-------------|-------------|-------------|---|-------------|-------------|-------------|
| C | -3.31523400 | -0.13016900 | 0.31727800  | O | -6.26341400 | -3.01051300 | 0.28642700  |
| C | -1.94060300 | -0.10031000 | -0.35843700 | C | -7.88978800 | -4.14398700 | 1.63926500  |
| C | -0.77410900 | -0.23320600 | 0.62756800  | H | -8.74827700 | -3.73266300 | 1.10387400  |
| C | 0.59854800  | -0.27405200 | -0.05298000 | H | -8.13219500 | -5.15360600 | 1.97426300  |
| C | 1.76673500  | -0.42149000 | 0.92894300  | H | -6.46220400 | -6.10124300 | 0.86113400  |
| H | -3.42772000 | -1.06411900 | 0.88028200  | H | -4.87593600 | -4.50801800 | -1.04862000 |
| H | -3.39542000 | 0.68659000  | 1.04291300  | H | -5.03409400 | -6.26548700 | -1.04883000 |
| H | -1.83091400 | 0.83286200  | -0.92528100 | H | -7.71025900 | -3.51225300 | 2.51153200  |
| H | -0.80417700 | 0.60072700  | 1.33987800  | C | -2.78332600 | 4.88780700  | -0.34885600 |
| H | -0.90788800 | -1.14621100 | 1.22245500  | C | -1.35768100 | 4.79105400  | -0.90192000 |
| H | 1.60438800  | -1.31207600 | 1.55044500  | C | -0.27273200 | 4.93256700  | 0.17200500  |
| H | 1.77302600  | 0.43291400  | 1.61731000  | C | 1.14852400  | 4.72788700  | -0.36475100 |
| H | 0.73791200  | 0.63760400  | -0.64741500 | C | 2.23613900  | 4.84455500  | 0.70947200  |
| H | 0.62145000  | -1.10820800 | -0.76638500 | H | -2.93562300 | 4.11333400  | 0.411347800 |
| H | -1.88264700 | -0.91234900 | -1.09529100 | H | -2.92847400 | 5.85209800  | 0.15003000  |
| C | 3.12883300  | -0.53195200 | 0.23640800  | H | -1.21005200 | 5.56051600  | -1.67030300 |
| C | 4.28554700  | -0.69956100 | 1.23007100  | H | -0.34969300 | 5.92295400  | 0.63784500  |
| N | 5.57447800  | -0.89291300 | 0.57539100  | H | -0.46144500 | 4.20465800  | 0.97205600  |
| C | 6.46580400  | 0.10073900  | 0.38725900  | H | 1.99663300  | 4.16427700  | 1.53782700  |
| O | 6.27936200  | 1.25858700  | 0.78062100  | H | 2.22234500  | 5.85673100  | 1.13295600  |
| C | 7.74215600  | -0.28077800 | -0.33704800 | H | 1.34635000  | 5.45504900  | -1.16237200 |
| H | 7.83306100  | 0.33178700  | -1.23691200 | H | 1.21362500  | 3.73725700  | -0.83395000 |
| H | 8.59416900  | -0.05035000 | 0.30635800  | H | -1.23391100 | 3.82560500  | -1.41097200 |
| H | 7.77618700  | -1.33495700 | -0.61459900 | C | 3.64114900  | 4.52497600  | 0.18841400  |
| H | 5.77505900  | -1.81800300 | 0.20518000  | C | 4.71382300  | 4.61012000  | 1.28240900  |
| H | 4.10260500  | -1.56662900 | 1.87210100  | N | 6.03458500  | 4.19852400  | 0.82504200  |
| H | 4.36705900  | 0.18036500  | 1.86981700  | C | 6.98055000  | 5.07549700  | 0.41375800  |
| H | 3.12386600  | -1.38762700 | -0.44902100 | O | 6.82003000  | 6.29706700  | 0.41024600  |
| H | 3.31304400  | 0.35906900  | -0.37382700 | C | 8.28873700  | 4.45431200  | -0.04639600 |
| C | -4.46829200 | -0.01687100 | -0.68818900 | H | 8.47601000  | 4.75562200  | -1.07959900 |
| N | -5.78301500 | -0.13210400 | -0.06781100 | H | 9.10077300  | 4.85520000  | 0.56445100  |
| C | -6.53662000 | 0.93142200  | 0.27622400  | H | 8.29096000  | 3.36534600  | 0.01943700  |
| O | -6.18773100 | 2.10199300  | 0.08272600  | H | 6.22639500  | 3.20183500  | 0.77355400  |
| C | -7.87181700 | 0.61883700  | 0.92337400  | H | 4.43553100  | 3.96914000  | 2.12514700  |
| H | -8.66609700 | 1.06763400  | 0.32282000  | H | 4.79398500  | 5.63384200  | 1.65227200  |
| H | -8.05822900 | -0.45103400 | 1.02477200  | H | 3.65171000  | 3.51474300  | -0.23801000 |
| H | -6.11752500 | -1.06913500 | 0.14013800  | C | 3.90758200  | 5.21237000  | -0.62200200 |
| H | -4.42704600 | 0.94281800  | -1.20595300 | H | -3.85016400 | 4.72957900  | -1.44066600 |
| H | -4.38547100 | -0.80707500 | -1.44036600 | N | -5.21169000 | 4.71837000  | -0.92297700 |
| H | -7.90209600 | 1.08596000  | 1.91026400  | C | -5.99600800 | 5.82253600  | -0.89143300 |
| C | -3.59821100 | -5.50400900 | 0.39125000  | O | -5.63361800 | 6.92233500  | -1.31214200 |
| C | -2.36451400 | -5.57946300 | -0.51504600 | C | -7.38140200 | 5.62199100  | -0.30206400 |
| C | -1.04821000 | -5.71255700 | 0.25997200  | H | -8.12475300 | 5.90140400  | -1.05232300 |
| C | 0.19139200  | -5.71980600 | -0.64206000 | H | -7.56170500 | 4.59687900  | 0.02398600  |
| C | 1.50761000  | -5.86790000 | 0.13037000  | H | -5.57132900 | 3.84499700  | -0.54951900 |
| H | -3.64209400 | -6.39263300 | 1.03270500  | H | -3.77472400 | 5.54858900  | -2.15829600 |
| H | -3.51703000 | -4.63838900 | 1.05744900  | H | -3.68874200 | 3.79243700  | -1.98361400 |
| H | -2.32481000 | -4.68088600 | -1.14344300 | H | -7.50199400 | 6.29930300  | 0.54659000  |
| H | -0.96652500 | -4.88626900 | 0.97739300  |   |             |             |             |
| H | -1.07043900 | -6.63342500 | 0.85662000  |   |             |             |             |
| H | 1.49990000  | -6.81804800 | 0.67987200  |   |             |             |             |
| H | 1.57302100  | -5.07732500 | 0.88840900  |   |             |             |             |
| H | 0.21766000  | -4.79041400 | -1.22481900 |   |             |             |             |
| H | 0.10605600  | -6.53502700 | -1.37192900 |   |             |             |             |
| H | -2.46628100 | -6.42872200 | -1.20303100 |   |             |             |             |
| C | 2.74790900  | -5.80539200 | -0.76812400 |   |             |             |             |
| C | 4.05155000  | -5.97337400 | 0.02188400  |   |             |             |             |
| N | 5.24847300  | -5.86410500 | -0.80924200 |   |             |             |             |
| C | 5.97713900  | -4.72835200 | -0.92749500 |   |             |             |             |
| O | 5.69648200  | -3.69818200 | -0.31089500 |   |             |             |             |
| C | 7.17203600  | -4.79146700 | -1.85586400 |   |             |             |             |
| H | 7.06110100  | -4.02357700 | -2.62426900 |   |             |             |             |
| H | 8.07324900  | -4.55977800 | -1.28426900 |   |             |             |             |
| H | 7.29755600  | -5.76195100 | -2.33827000 |   |             |             |             |
| H | 5.51927700  | -6.66188900 | -1.36332000 |   |             |             |             |
| H | 4.07240800  | -6.94751000 | 0.51933300  |   |             |             |             |
| H | 4.12854200  | -5.20506700 | 0.79214100  |   |             |             |             |
| H | 2.68740500  | -6.58411500 | -1.53830000 |   |             |             |             |
| H | 2.77665700  | -4.84485700 | -1.29365300 |   |             |             |             |
| C | -4.90259300 | -5.38941200 | -0.40689600 |   |             |             |             |
| N | -6.08860100 | -5.26579500 | 0.43770600  |   |             |             |             |
| C | -6.67741400 | -4.08239300 | 0.73364400  |   |             |             |             |

## 9-anti-t

Gibbs Free Energy= -2312.871612

|   |             |             |             |   |             |             |             |
|---|-------------|-------------|-------------|---|-------------|-------------|-------------|
| C | -3.01665700 | 4.91229600  | -0.67809400 | C | -3.76810900 | -0.72578800 | -0.53948600 |
| C | -1.82116100 | 4.86073000  | 0.28017300  | C | -5.02070700 | -1.00986000 | -1.37784100 |
| C | -0.51893100 | 5.38857000  | -0.33282000 | N | -6.21650900 | -1.21994800 | -0.56857300 |
| C | 0.68306700  | 5.29914700  | 0.61432500  | C | -7.06354600 | -0.22339400 | -0.24477400 |
| C | 1.98986500  | 5.80988200  | -0.00359100 | O | -6.90693900 | 0.94350800  | -0.62651800 |
| H | -3.17241100 | 5.94706600  | -1.00859000 | C | -8.25030700 | -0.61073300 | 0.61554900  |
| H | -2.77764100 | 4.33633900  | -1.58198300 | H | -6.37602000 | -2.15147800 | -0.19321000 |
| H | -1.66962700 | 3.82508500  | 0.61130000  | H | -4.87114100 | -1.90586400 | -1.98683300 |
| H | -0.29734000 | 4.82657600  | -1.24944700 | H | -3.60726300 | -1.55914300 | 0.15459900  |
| H | -0.66107300 | 6.43177500  | -0.64278600 | H | -3.95090900 | 0.16388700  | 0.07298800  |
| H | 1.86610600  | 6.86033800  | -0.29671600 | H | -5.21773400 | -0.17442900 | -2.05208100 |
| H | 2.19171500  | 5.25672400  | -0.92968800 | H | -8.25436500 | -1.66758000 | 0.88427000  |
| H | 0.81777300  | 4.25605100  | 0.92821100  | H | -8.24067400 | -0.00574800 | 1.52491100  |
| H | 0.46797400  | 5.86659400  | 1.52879600  | H | -9.16885200 | -0.37567900 | -0.07284400 |
| H | -2.05656700 | 5.43736800  | 1.18373000  | C | -1.99199900 | -5.81520800 | -0.01034800 |
| C | 3.19582600  | 5.67864200  | 0.93305300  | C | -0.68596500 | -5.29560200 | 0.60172600  |
| C | 4.49373800  | 6.17843900  | 0.28796700  | C | 0.51684200  | -5.39144900 | -0.34383700 |
| N | 5.66421800  | 6.03469500  | 1.15222800  | C | 1.81695100  | -4.85567500 | -0.26675300 |
| C | 6.47432200  | 4.95067700  | 1.13846600  | C | 3.01486200  | -4.91170800 | -0.68824200 |
| O | 6.29807900  | 4.00720600  | 0.36371900  | H | -2.19635000 | -5.27133400 | -0.94137800 |
| C | 7.62582200  | 4.96009700  | 2.12236300  | H | -1.86617500 | -6.86820200 | -0.29338000 |
| H | 7.54663500  | 4.08157300  | 2.76606900  | H | -0.46945700 | -5.85363500 | 1.52164400  |
| H | 8.56279600  | 4.88051400  | 1.56705900  | H | 0.66116800  | -6.43725100 | -0.64392000 |
| H | 7.65772700  | 5.85533000  | 2.74519800  | H | 0.29532100  | -4.83822100 | -1.26579500 |
| H | 5.84585800  | 6.75526400  | 1.83371400  | H | 2.77848900  | -4.34025600 | -1.59567800 |
| H | 4.40455000  | 7.23510100  | 0.02066400  | H | 3.17175500  | -5.94815100 | -1.01296200 |
| H | 4.69835400  | 5.62079500  | -0.62715900 | H | 2.05219300  | -5.42471300 | 1.17518200  |
| H | 3.01046000  | 6.23985700  | 1.85699200  | H | 1.66230900  | -3.81794100 | 0.58972100  |
| H | 3.32903900  | 4.63055100  | 1.22186000  | H | -0.82300100 | -4.24984300 | 0.90552300  |
| C | -4.31393400 | 4.37697200  | -0.06285800 | C | 4.31006200  | -4.37351000 | -0.07108000 |
| C | -5.48718300 | 4.39644500  | -1.05175200 | C | 5.48672900  | -4.39483500 | -1.05593200 |
| N | -6.72962200 | 3.88480800  | -0.48790700 | N | 6.72828900  | -3.88744700 | -0.48693100 |
| C | -7.66216300 | 4.69040200  | 0.07287100  | C | 7.65318500  | -4.69646000 | 0.08179800  |
| O | -7.54380000 | 5.91503600  | 0.14586100  | O | 7.52921500  | -5.92040800 | 0.15421900  |
| C | -8.89566000 | 3.98716600  | 0.61261700  | C | 8.88486100  | -3.99780400 | 0.63137000  |
| H | -6.87996100 | 2.87926000  | -0.49442900 | H | 8.96854600  | -4.21978500 | 1.69780600  |
| H | -5.24438600 | 3.79114000  | -1.93045200 | H | 9.76915800  | -4.41025900 | 0.14020100  |
| H | -4.16034700 | 3.34961900  | 0.28846500  | H | 8.86261000  | -2.91690700 | 0.48655500  |
| H | -4.58447400 | 4.97430700  | 0.81455600  | H | 6.87952600  | -2.88225900 | -0.48521000 |
| H | -5.67169400 | 5.41842500  | -1.38877700 | H | 5.24887200  | -3.78860500 | -1.93538200 |
| H | -8.86962300 | 2.90675200  | 0.46476600  | H | 5.67023400  | -5.41710100 | -1.39263600 |
| H | -8.98703000 | 4.20599600  | 1.67906800  | H | 4.15474300  | -3.34555800 | 0.27767900  |
| H | -9.77788300 | 4.39856000  | 0.11676900  | H | 4.57873300  | -4.96871100 | 0.80836900  |
| C | -2.51574300 | -0.51780000 | -1.39704500 | C | -3.19632000 | -5.67769600 | 0.92748800  |
| C | -1.25745900 | -0.23599300 | -0.56833000 | C | -4.49543800 | -6.18751000 | 0.29255300  |
| C | 0.00322900  | -0.01747900 | -1.41213200 | N | -5.66253200 | -6.03591400 | 1.16033100  |
| C | 1.25624400  | 0.25253600  | -0.57182800 | C | -6.46544800 | -4.94655400 | 1.14895800  |
| C | 2.52135900  | 0.48752300  | -1.40482600 | O | -6.28815300 | -4.00621500 | 0.37042700  |
| H | -2.68528200 | 0.31399400  | -2.09264300 | C | -7.61032800 | -4.94536800 | 2.14050600  |
| H | -2.34750400 | -1.40617300 | -2.01971700 | H | -5.84691000 | -6.75559200 | 1.84199600  |
| H | -1.08793900 | -1.07011400 | 0.12487800  | H | -4.40574600 | -7.24711000 | 0.03747000  |
| H | 0.17425800  | -0.89808500 | -2.04465600 | H | -3.00697600 | -6.22882700 | 1.85657700  |
| H | -0.16175400 | 0.82269100  | -2.09900300 | H | -3.33140100 | -4.62710800 | 1.20612900  |
| H | 2.36036300  | 1.34355800  | -2.07309200 | H | -4.70433600 | -5.64103300 | -0.62838000 |
| H | 2.69311700  | -0.37903900 | -2.05593800 | H | -7.65750200 | -5.84813100 | 2.75131900  |
| H | 1.42417600  | -0.59307600 | 0.10745400  | H | -7.50724200 | -4.07803100 | 2.79614800  |
| H | 1.07977500  | 1.12589300  | 0.06931000  | H | -8.54886400 | -4.83697600 | 1.59299800  |
| H | -1.43005100 | 0.64842300  | 0.05829500  |   |             |             |             |
| C | 3.76860300  | 0.73432500  | -0.55009300 |   |             |             |             |
| C | 5.02456000  | 0.98827200  | -1.39314200 |   |             |             |             |
| N | 6.21868900  | 1.22153800  | -0.58766800 |   |             |             |             |
| C | 7.06551600  | 0.23448200  | -0.23525600 |   |             |             |             |
| O | 6.91002400  | -0.94211100 | -0.58595900 |   |             |             |             |
| C | 8.25033500  | 0.64555900  | 0.61653700  |   |             |             |             |
| H | 8.24168700  | 0.06133200  | 1.53938600  |   |             |             |             |
| H | 9.17010600  | 0.40128200  | 0.08007500  |   |             |             |             |
| H | 8.24985800  | 1.70831000  | 0.86083700  |   |             |             |             |
| H | 6.37507600  | 2.16106600  | -0.23171300 |   |             |             |             |
| H | 4.87863300  | 1.86409400  | -2.03181700 |   |             |             |             |
| H | 5.22214400  | 0.13107200  | -2.03929100 |   |             |             |             |
| H | 3.60210100  | 1.59439700  | 0.10917600  |   |             |             |             |
| H | 3.95091000  | -0.12965800 | 0.09824100  |   |             |             |             |

## 9-para-t

Gibbs Free Energy= -2312.870467

|   |             |             |             |   |             |             |             |
|---|-------------|-------------|-------------|---|-------------|-------------|-------------|
| C | -2.54308600 | -0.39554200 | 1.37516000  | C | -3.50476500 | -5.79311800 | -0.66278300 |
| C | -1.24397800 | -0.36250100 | 0.56235000  | C | -4.80615800 | -5.90630600 | 0.14055800  |
| C | 0.02265000  | -0.26185600 | 1.41947300  | N | -6.00691200 | -5.79713100 | -0.68527200 |
| C | 1.31263800  | -0.26111600 | 0.59182500  | C | -6.70799400 | -4.64888300 | -0.84160800 |
| C | 2.59081200  | -0.17451500 | 1.43347800  | O | -6.39633400 | -3.60281100 | -0.26810900 |
| H | -2.50634600 | -1.23555300 | 2.08129000  | C | -7.91157600 | -4.71760900 | -1.75847700 |
| H | -2.61344900 | 0.51335200  | 1.98593700  | H | -8.07748900 | -5.70780900 | -2.18540300 |
| H | -1.27629700 | 0.48343500  | -0.13581600 | H | -7.77695600 | -3.99886800 | -2.56961000 |
| H | -0.02051600 | 0.65036700  | 2.02797000  | H | -4.85978100 | -5.11240000 | 0.88645700  |
| H | 0.04773500  | -1.09973800 | 2.12852400  | H | -3.50912000 | -4.84242400 | -1.20670100 |
| H | 2.60491100  | -1.00122300 | 2.15594300  | H | -3.47424100 | -6.58820800 | -1.41782300 |
| H | 2.57387100  | 0.74853700  | 2.02659200  | H | -6.30335500 | -6.60862200 | -1.20528300 |
| H | 1.28889700  | 0.57815000  | -0.11466400 | H | -8.79875200 | -4.41955100 | -1.19596300 |
| H | 1.34693400  | -1.17166900 | -0.02064200 | H | -4.84535700 | -6.86352800 | 0.66878100  |
| H | -1.18679400 | -1.26591800 | -0.05893300 | C | -2.83440900 | 5.05603300  | 0.64825900  |
| C | 3.86839200  | -0.21677200 | 0.58888300  | C | -1.56811100 | 4.74507300  | -0.15807100 |
| C | 5.14462600  | -0.13287200 | 1.43549400  | C | -0.27405400 | 5.18961900  | 0.53331100  |
| N | 6.36436100  | -0.23750500 | 0.64168400  | C | 0.99414400  | 4.82896000  | -0.24882300 |
| C | 7.01733100  | 0.83581000  | 0.15437200  | C | 2.29081300  | 5.24864900  | 0.45345500  |
| O | 6.65505500  | 1.99902300  | 0.37035300  | H | -2.75504600 | 4.58351100  | 1.63647200  |
| C | 8.24928900  | 0.54293800  | -0.67980400 | H | -2.89264300 | 6.13648100  | 0.83118300  |
| H | 8.10373600  | 0.95411200  | -1.68146200 | H | -1.63745300 | 5.22534300  | -1.14238400 |
| H | 9.10540500  | 1.05436700  | -0.23454800 | H | -0.30406200 | 6.27442500  | 0.69693100  |
| H | 8.46751600  | -0.52276800 | -0.75841600 | H | -0.22363700 | 4.73317500  | 1.53072000  |
| H | 6.68526500  | -1.17066900 | 0.39783300  | H | 2.31525000  | 4.80560900  | 1.45797200  |
| H | 5.15995900  | -0.94081800 | 2.17257200  | H | 2.28780300  | 6.33620300  | 0.59989800  |
| H | 5.17751000  | 0.81506400  | 1.97527500  | H | 0.95368000  | 5.29422000  | -1.24184400 |
| H | 3.89176200  | -1.14349000 | 0.00361600  | H | 1.01365000  | 3.74475900  | -0.42143000 |
| H | 3.86782800  | 0.61005200  | -0.12949900 | H | -1.52131700 | 3.66483500  | -0.34936200 |
| C | -3.79458700 | -0.52207600 | 0.50051100  | C | 3.55561900  | 4.84141200  | -0.30975400 |
| C | -5.08982400 | -0.58296800 | 1.31951900  | C | 4.84319500  | 5.25141000  | 0.41765100  |
| N | -6.27770100 | -0.75963300 | 0.49128200  | N | 6.05574100  | 4.81905400  | -0.26559700 |
| C | -7.06220100 | 0.26459900  | 0.10109400  | C | 6.73983800  | 5.61590400  | -1.11969600 |
| O | -6.85879900 | 1.43683400  | 0.44028900  | O | 6.41049400  | 6.77466200  | -1.37891900 |
| C | -8.24065000 | -0.09866100 | -0.78127100 | C | 7.97237700  | 4.99231400  | -1.75266300 |
| H | -8.28431700 | -1.16217900 | -1.01874500 | H | 7.84911900  | 4.99542400  | -2.83828000 |
| H | -8.17786000 | 0.47580100  | -1.70806100 | H | 8.83891900  | 5.61500200  | -1.51936100 |
| H | -5.21956400 | 0.33628900  | 1.89259000  | H | 8.15866900  | 3.97263900  | -1.41291400 |
| H | -3.85371500 | 0.32603700  | -0.19046800 | H | 6.36874000  | 3.86320200  | -0.11621400 |
| H | -3.72290300 | -1.42593300 | -0.11589200 | H | 4.85477100  | 4.82134500  | 1.42394700  |
| H | -6.47396100 | -1.69678500 | 0.14971000  | H | 4.88703200  | 6.33768400  | 0.51613400  |
| H | -9.16311200 | 0.19343100  | -0.27406900 | H | 3.56281000  | 3.75494000  | -0.45811300 |
| H | -5.04745800 | -1.41750300 | 2.02586200  | H | 3.55324500  | 5.29689500  | -1.30595700 |
| C | -2.25950100 | -5.87669100 | 0.22716300  | C | -4.12297100 | 4.58589200  | -0.03479600 |
| C | -0.94573900 | -5.75509100 | -0.55408400 | C | -5.37204800 | 4.84595700  | 0.81747400  |
| C | 0.30119300  | -5.79513500 | 0.33715200  | N | -6.60100000 | 4.36832000  | 0.19751900  |
| C | 1.61379600  | -5.65219600 | -0.44206900 | C | -7.46150400 | 5.18490700  | -0.45530300 |
| C | 2.85993400  | -5.66287400 | 0.45134400  | O | -7.29282000 | 6.40020700  | -0.56947900 |
| H | -2.26669600 | -6.82537100 | 0.77930000  | C | -8.68409200 | 4.50489500  | -1.04825200 |
| H | -2.30398400 | -5.08293300 | 0.98341500  | H | -8.70932500 | 3.43077000  | -0.85982300 |
| H | -0.95148400 | -4.81733400 | -1.12393600 | H | -8.69806900 | 4.68481500  | -2.12572100 |
| H | 0.23598700  | -4.99319200 | 1.08353500  | H | -5.48948900 | 5.91604400  | 0.99597800  |
| H | 0.31443000  | -6.73634100 | 0.90177300  | H | -4.24155700 | 5.09281200  | -0.99891700 |
| H | 2.89079700  | -6.60149200 | 1.01960200  | H | -4.05634400 | 3.51234100  | -0.24857800 |
| H | 2.77830700  | -4.85905300 | 1.19377900  | H | -6.79155900 | 3.37015300  | 0.22966700  |
| H | 1.59184400  | -4.71815800 | -1.01758300 | H | -9.57990500 | 4.96672700  | -0.62695500 |
| H | 1.68899000  | -6.46231300 | -1.17872800 | H | -5.26732400 | 4.35226100  | 1.78922600  |
| H | -0.88850700 | -6.56214100 | -1.29566400 |   |             |             |             |
| C | 4.16733000  | -5.49665200 | -0.33115600 |   |             |             |             |
| C | 5.40030600  | -5.49301300 | 0.58062100  |   |             |             |             |
| N | 6.65704300  | -5.33689100 | -0.14891800 |   |             |             |             |
| C | 7.28065600  | -4.14751500 | -0.32306100 |   |             |             |             |
| O | 6.84226200  | -3.09799100 | 0.15313700  |   |             |             |             |
| C | 8.56279900  | -4.17420400 | -1.12911900 |   |             |             |             |
| H | 8.46119700  | -3.49099500 | -1.97475200 |   |             |             |             |
| H | 9.37878400  | -3.80708100 | -0.50292200 |   |             |             |             |
| H | 8.82116500  | -5.16627600 | -1.50257300 |   |             |             |             |
| H | 7.05569400  | -6.15150000 | -0.58960800 |   |             |             |             |
| H | 5.45566100  | -6.42561900 | 1.14962300  |   |             |             |             |
| H | 5.34009400  | -4.67074100 | 1.29471700  |   |             |             |             |
| H | 4.26338600  | -6.30556300 | -1.06570300 |   |             |             |             |
| H | 4.14584300  | -4.55896300 | -0.89671900 |   |             |             |             |
